# Supplementary material for: A Highly Conserved Region in BRCA2 Suppresses the RAD51-Interaction Activity of BRC Repeats
Source: MDPI journal article supplement (doi:10.3390/vetsci10020145), 2023-02-10
Supplement: s1 [file s1]

(A)

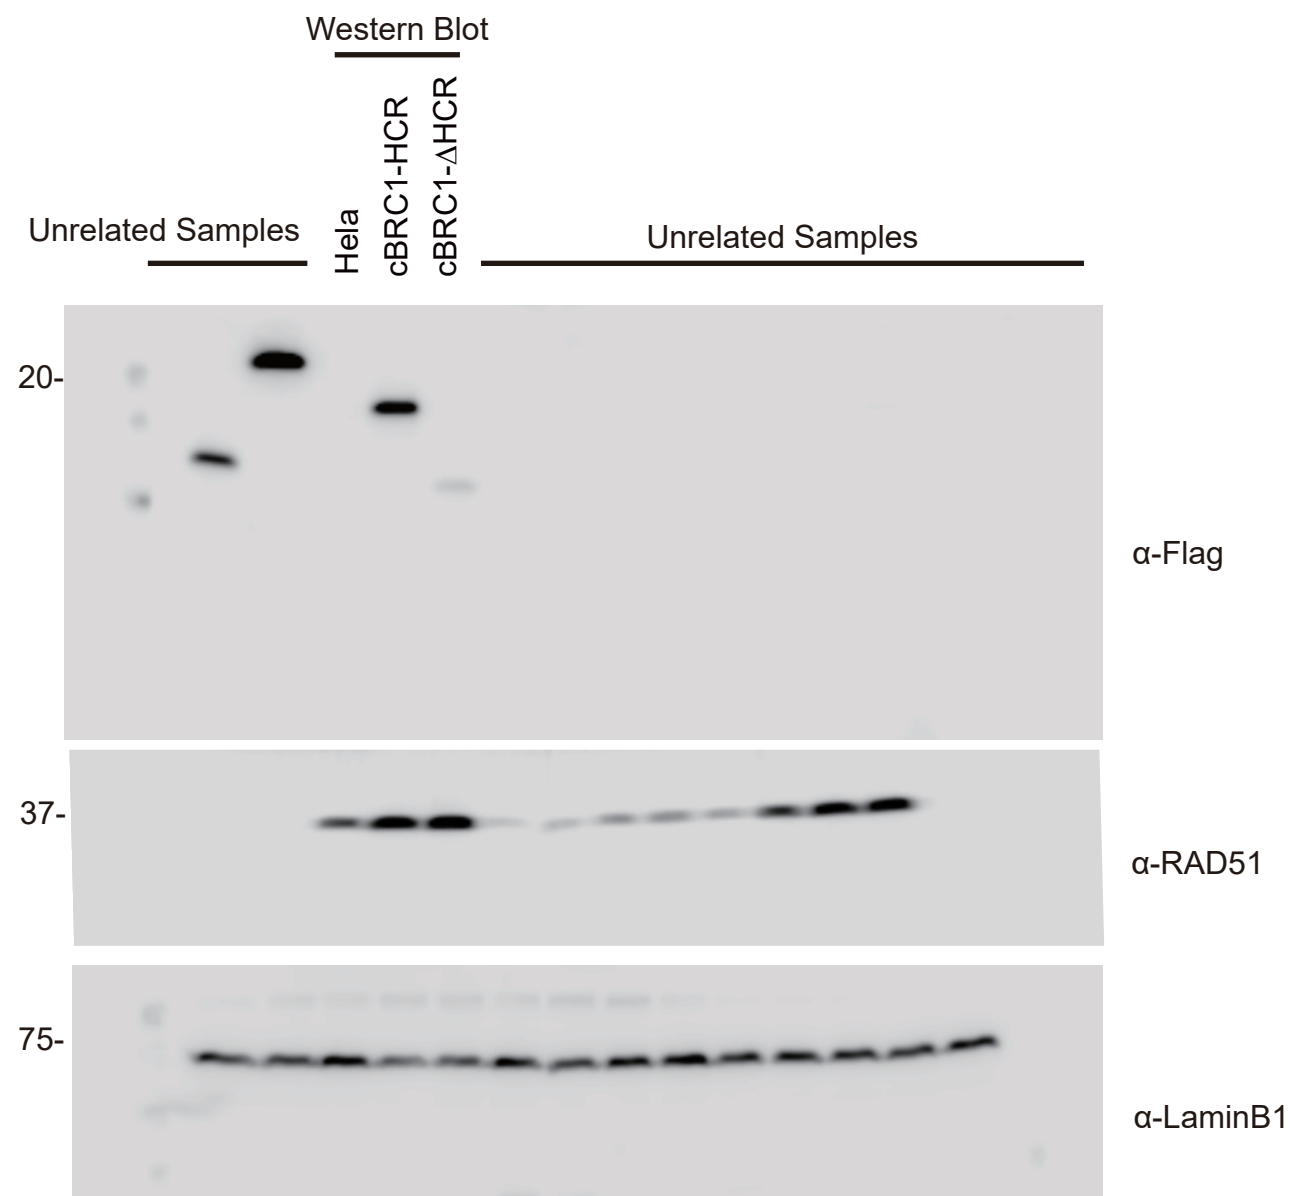

(B)

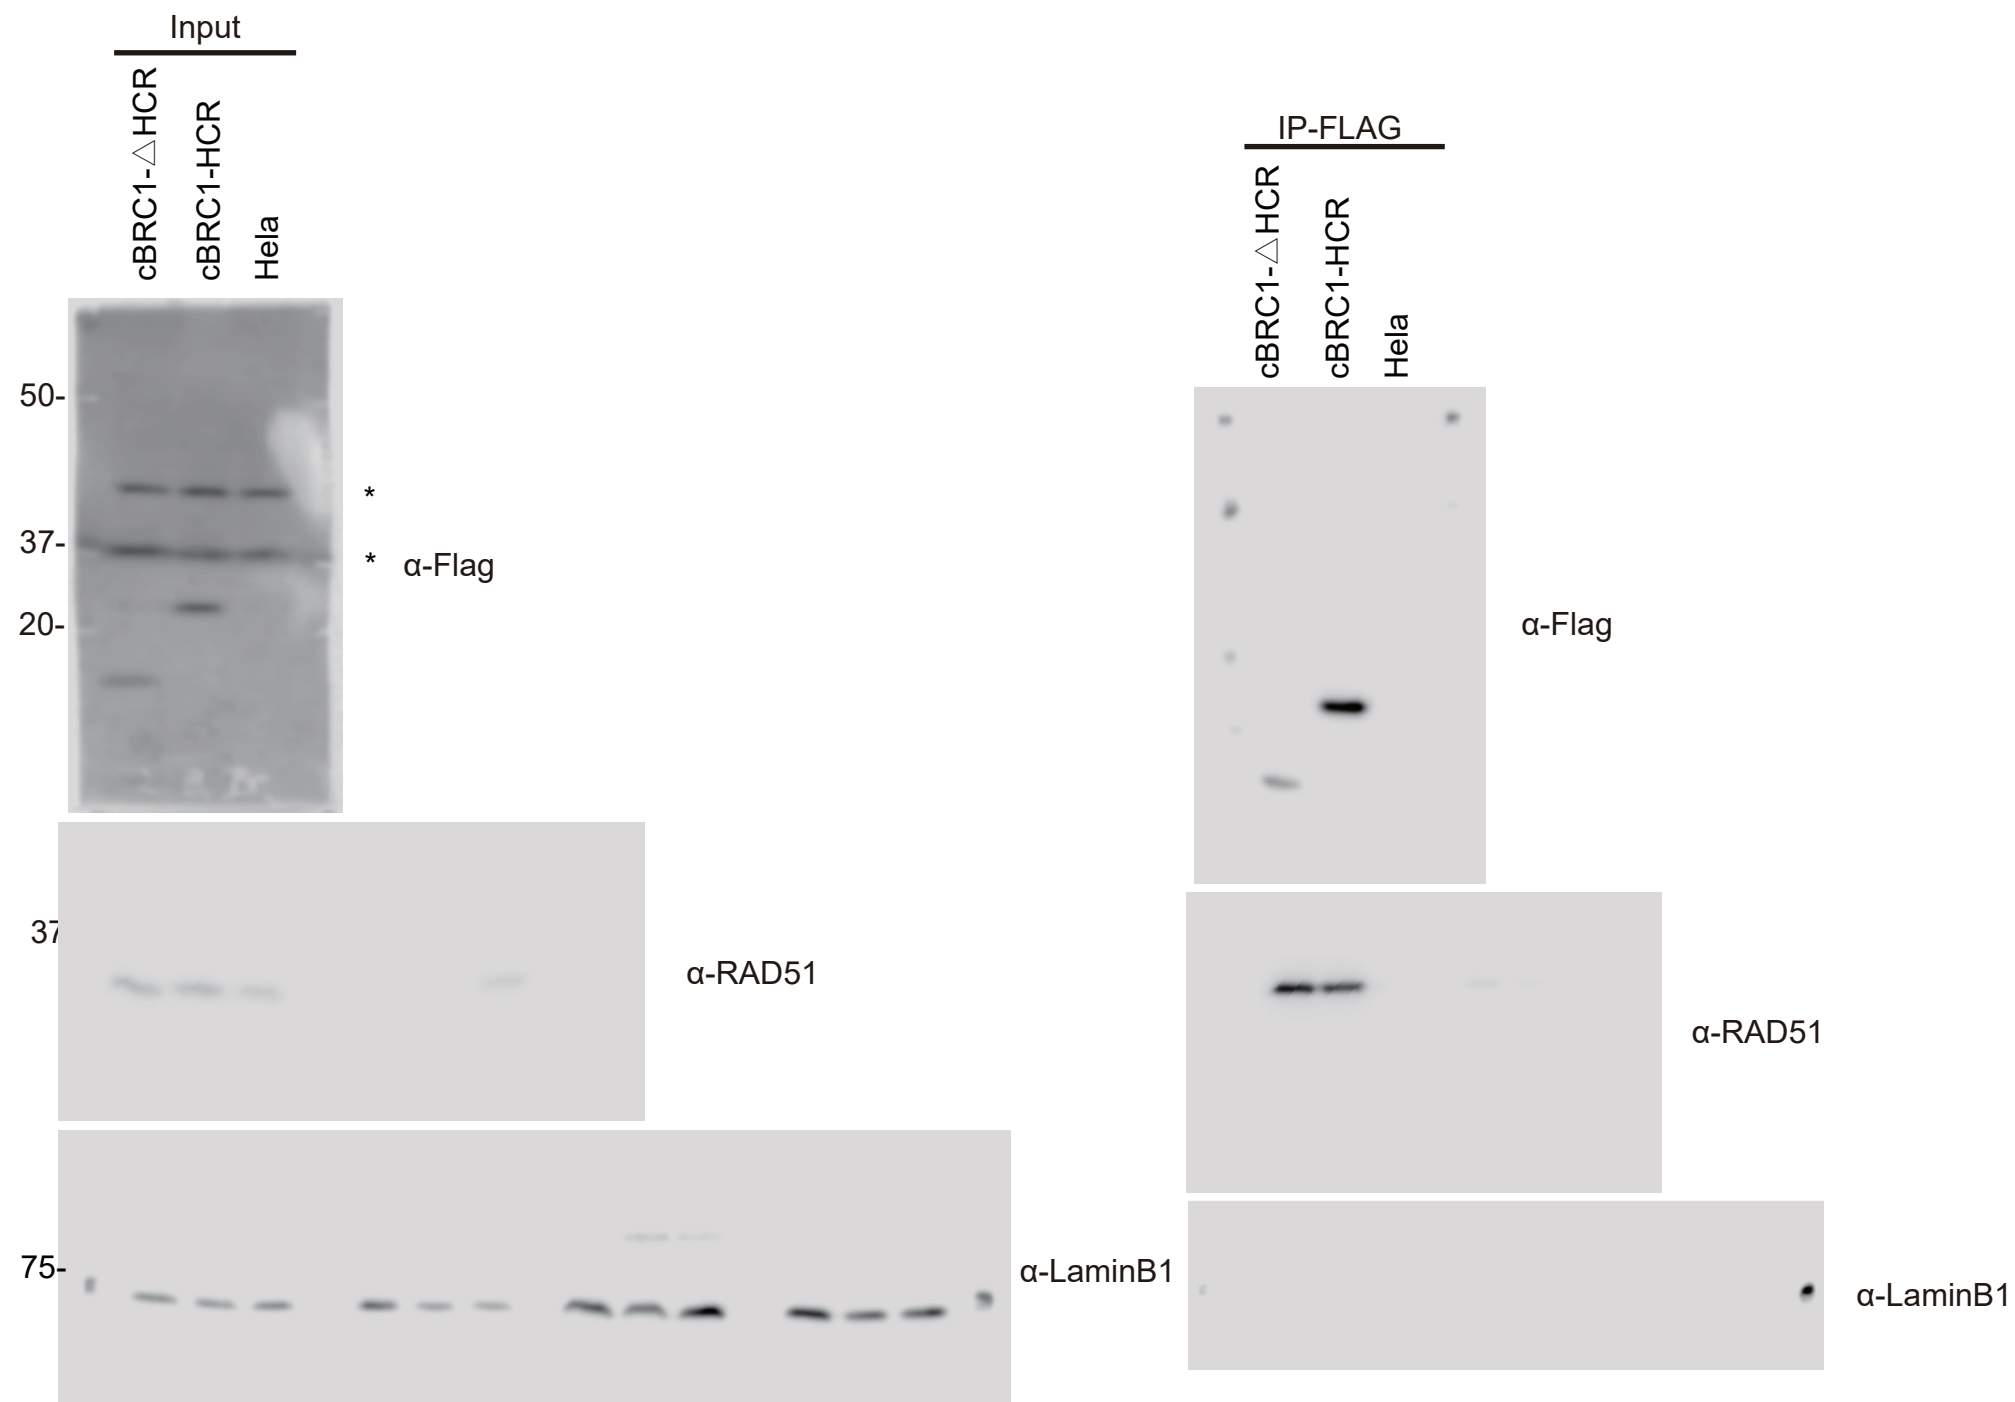

Asterisks (\*) indicate indicate nonspecific bands

(C)

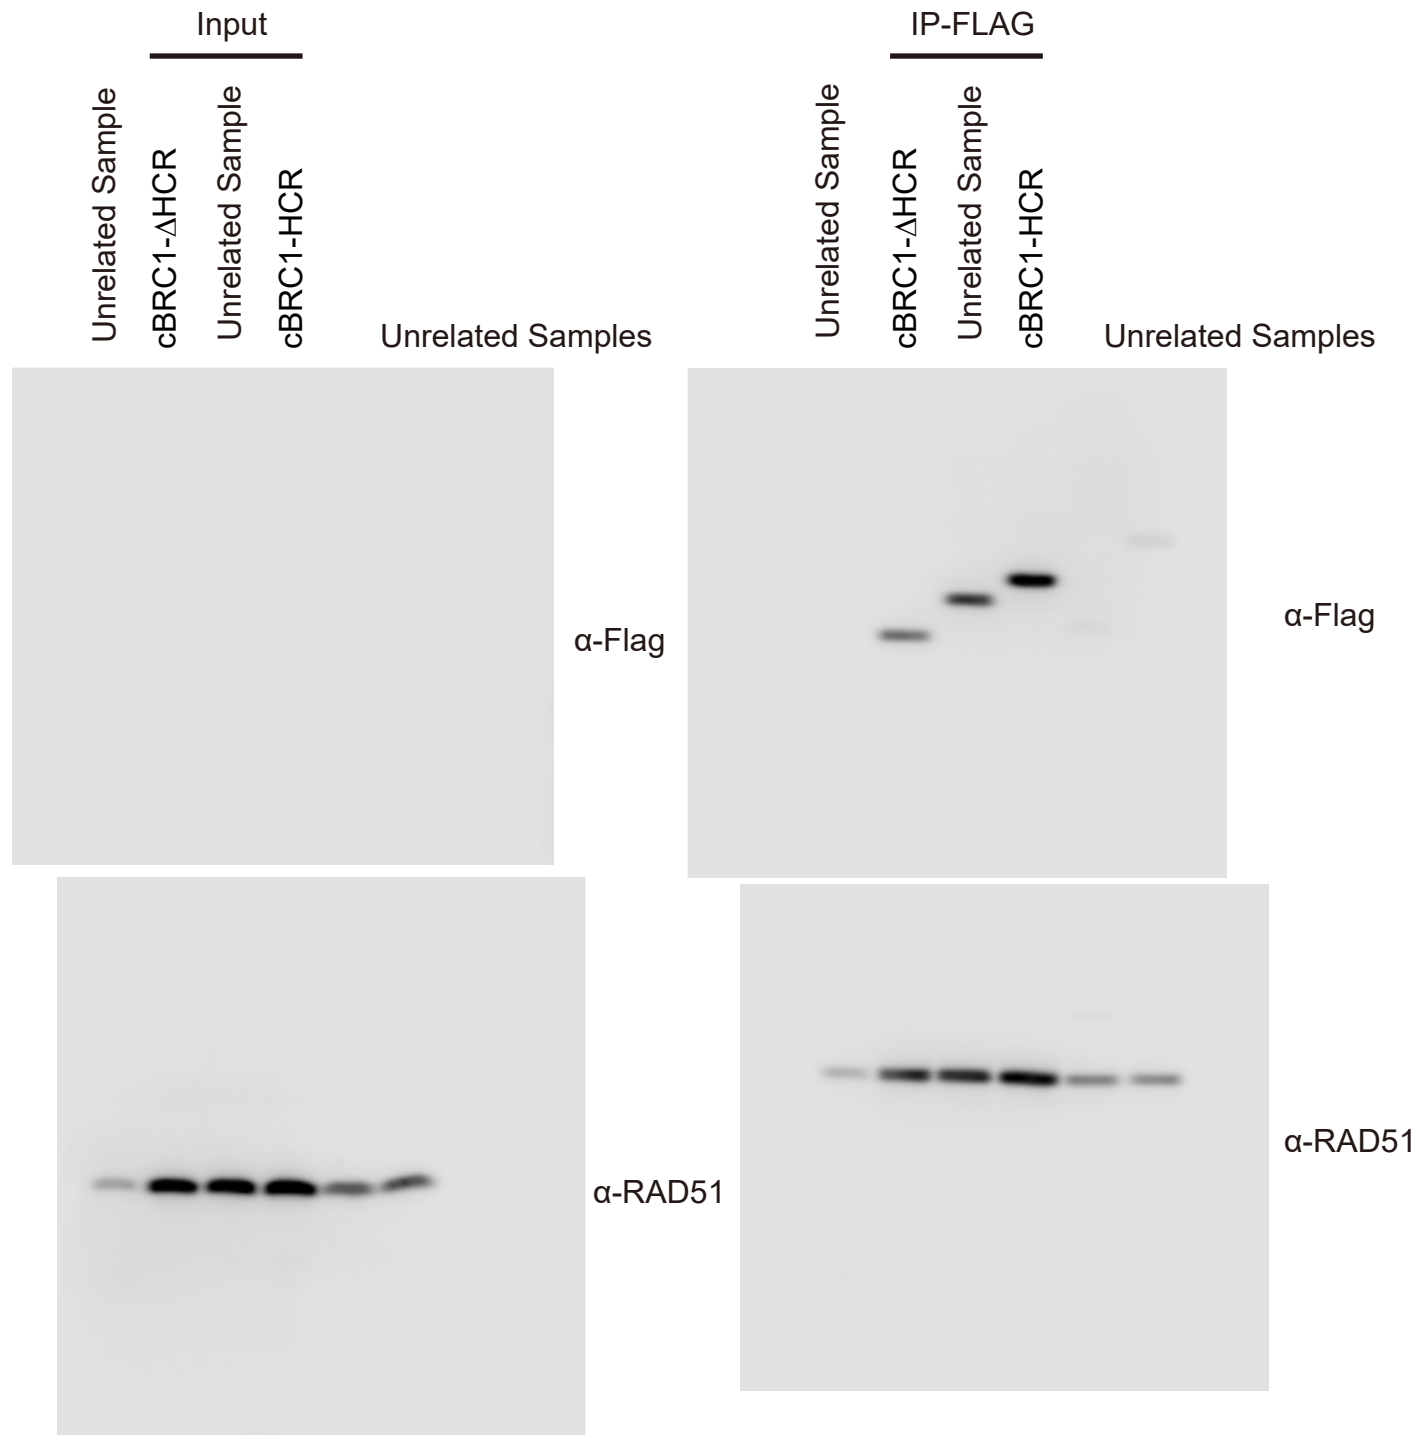

(D)

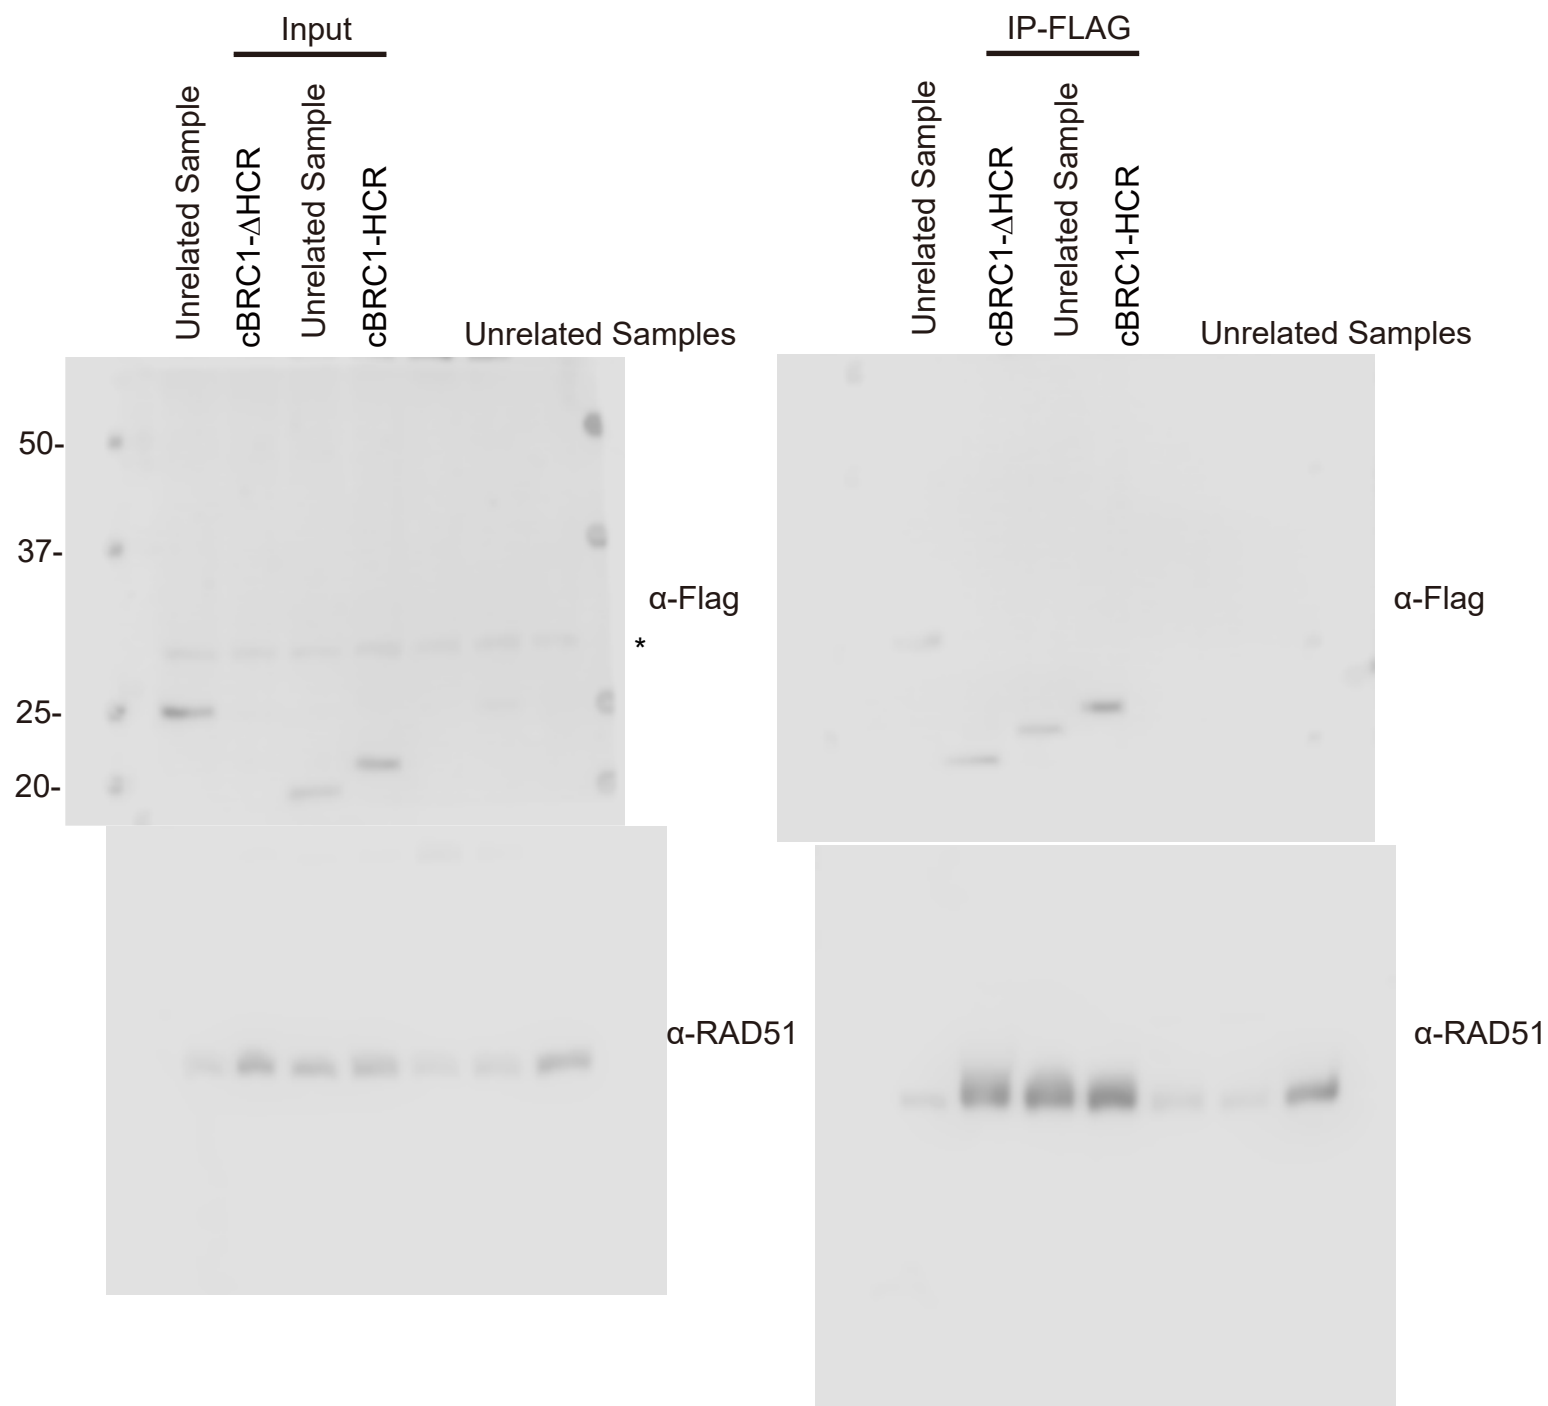



(E)

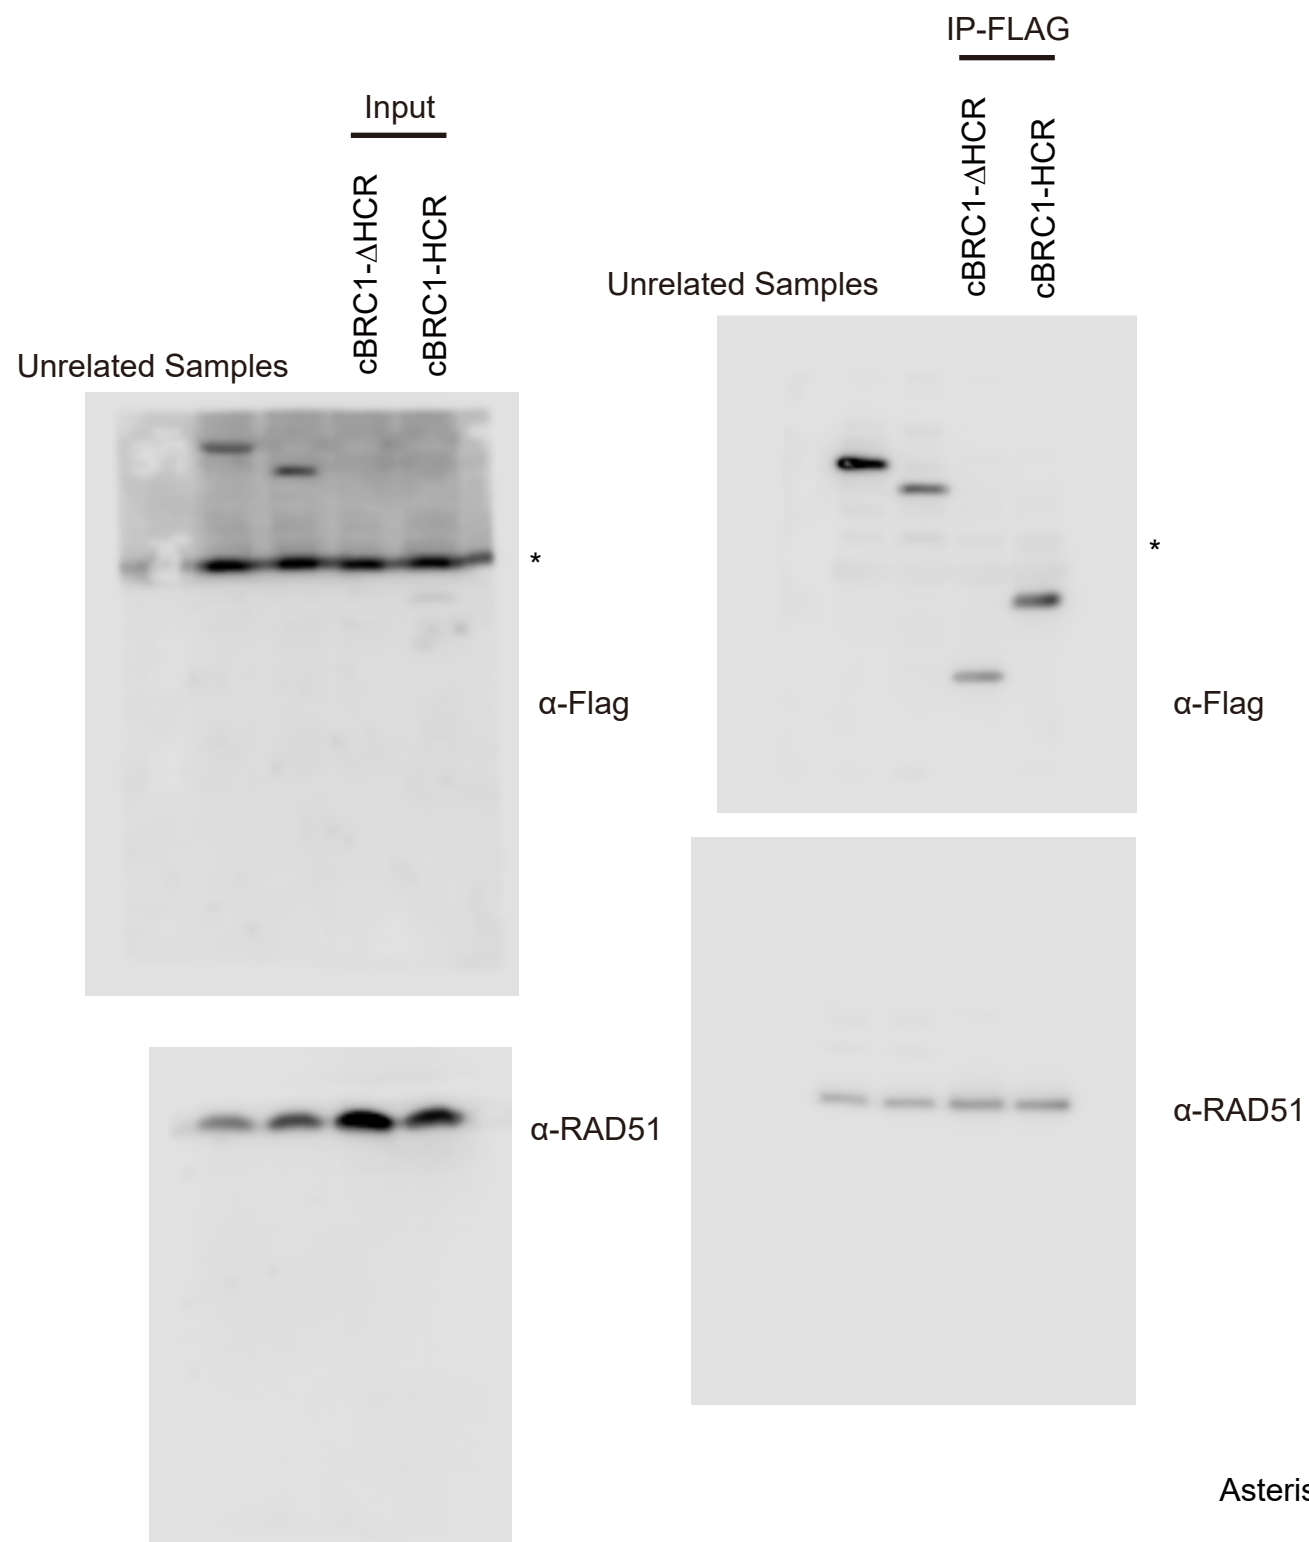

(F)

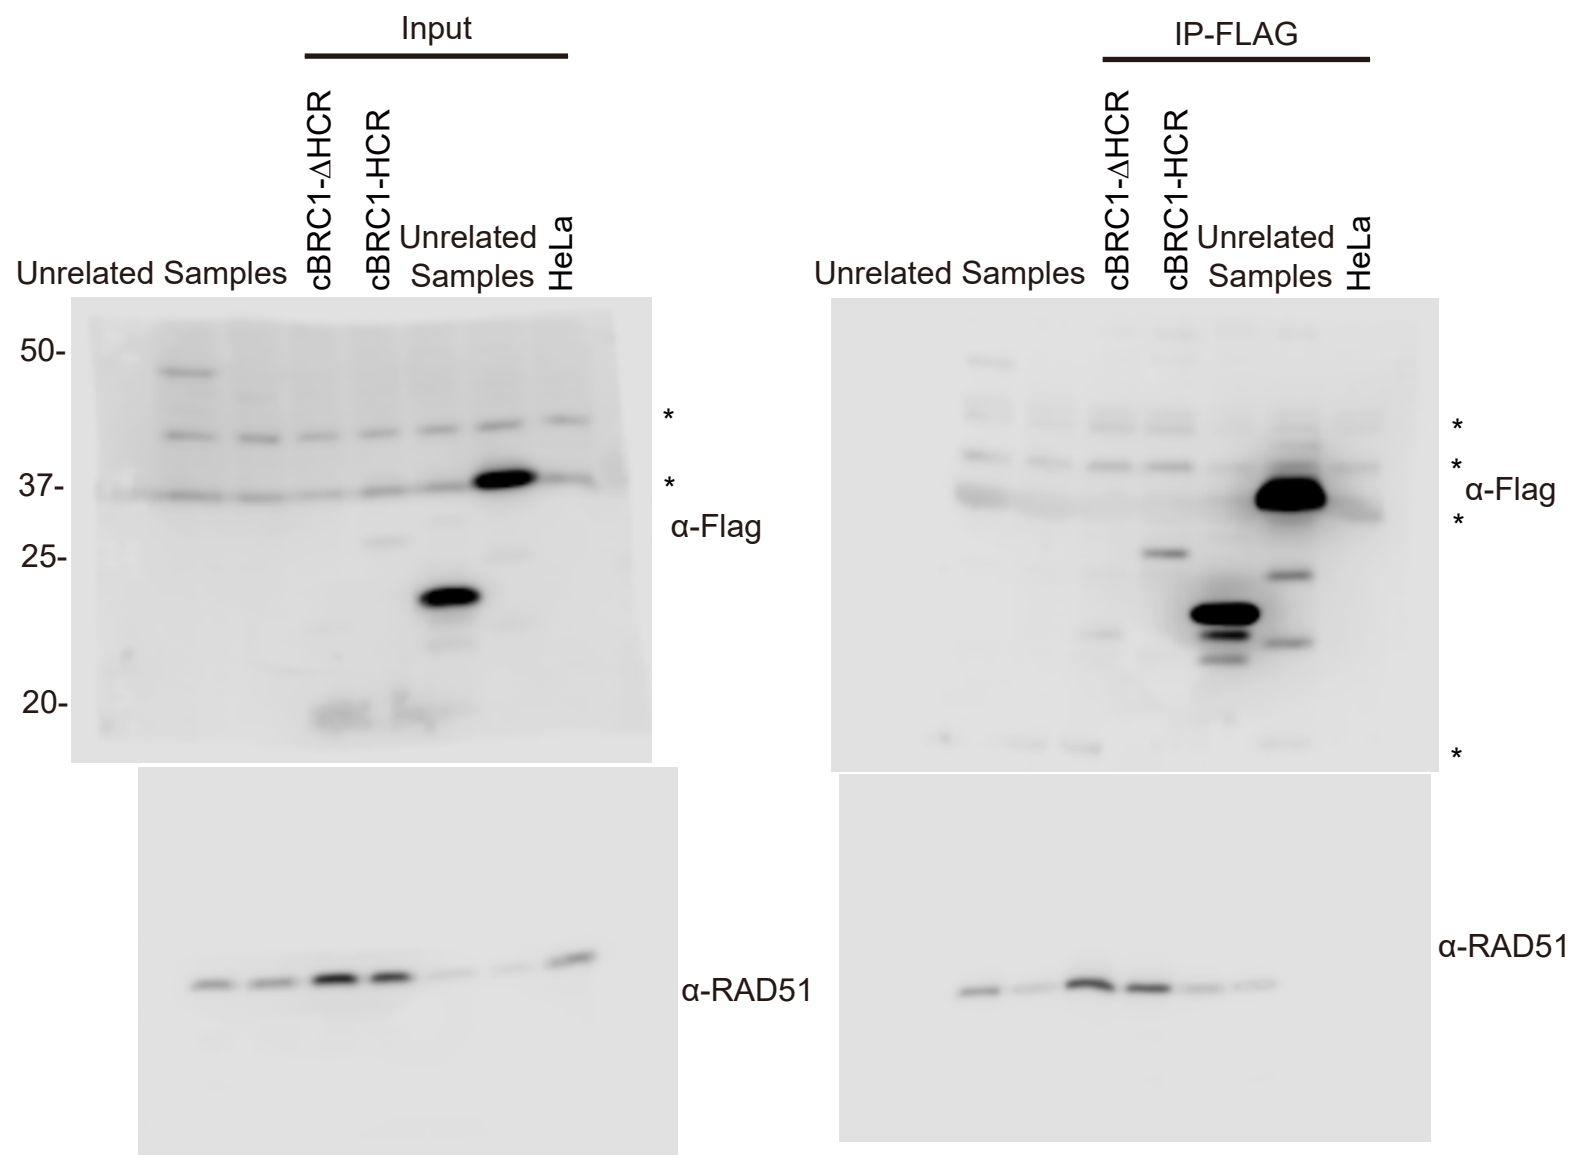

Asterisks (\*) indicate nonspecific bands.

(G)

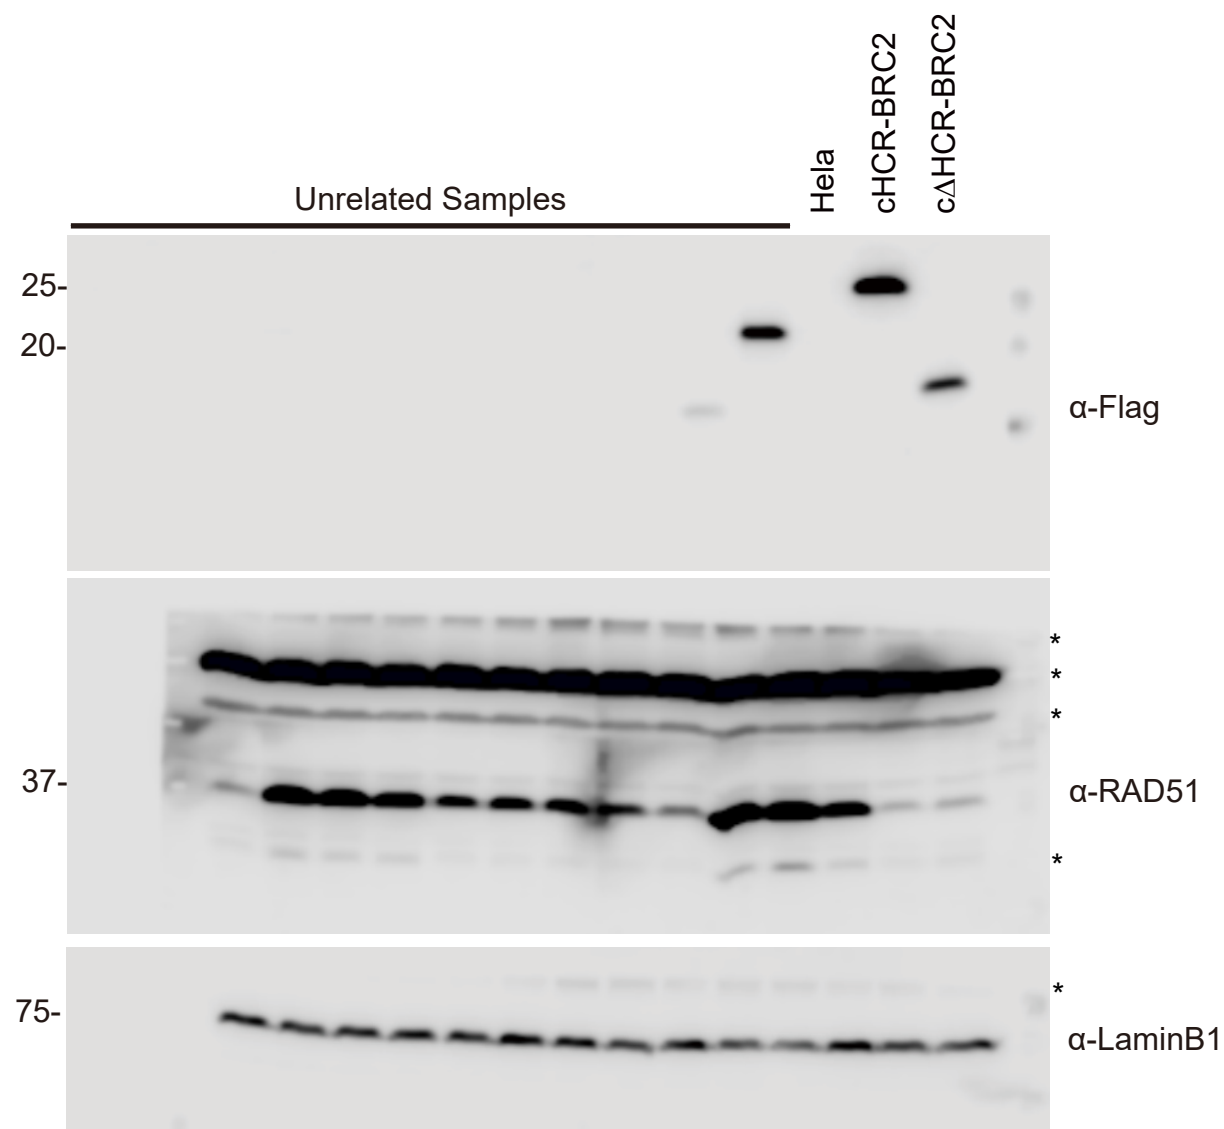

Asterisks (\*) indicate indicate unrelated bands or nonspecific bands

(H)

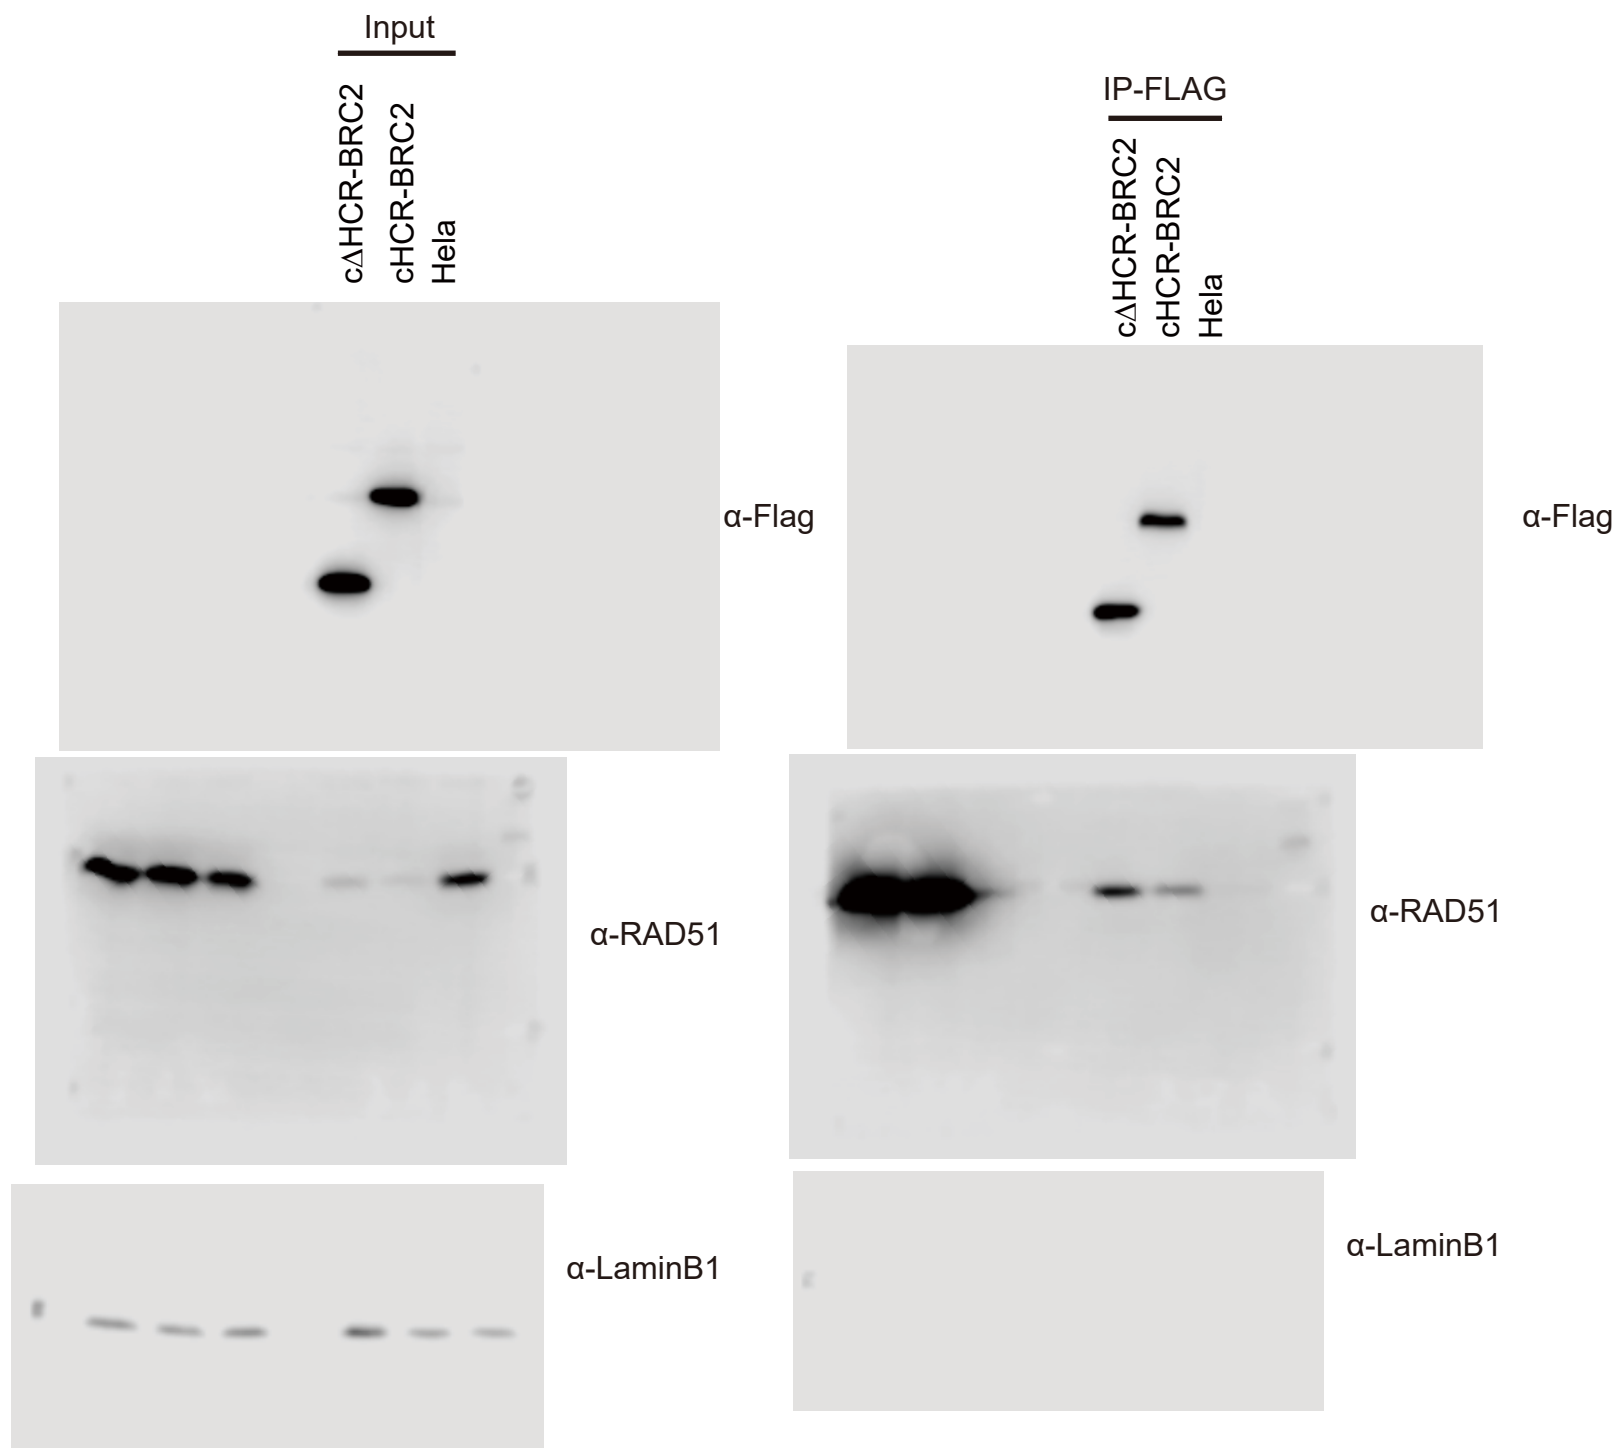

(I)

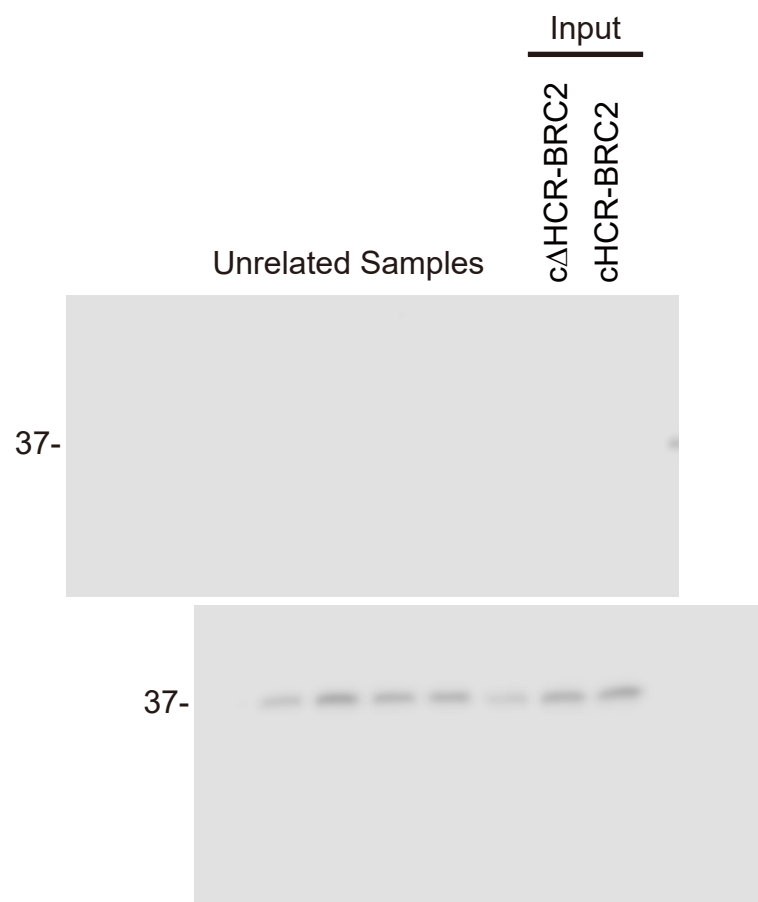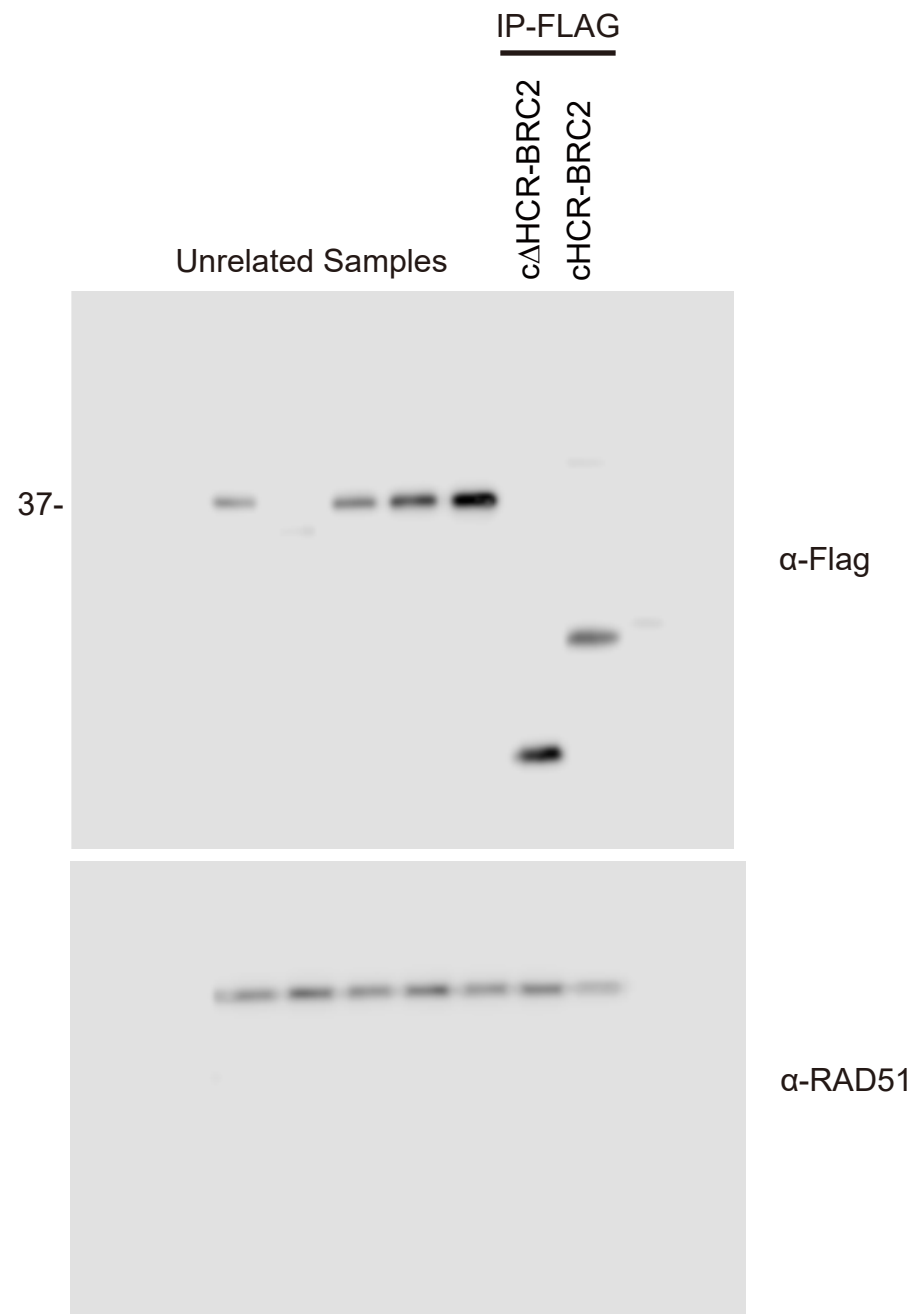

(J)

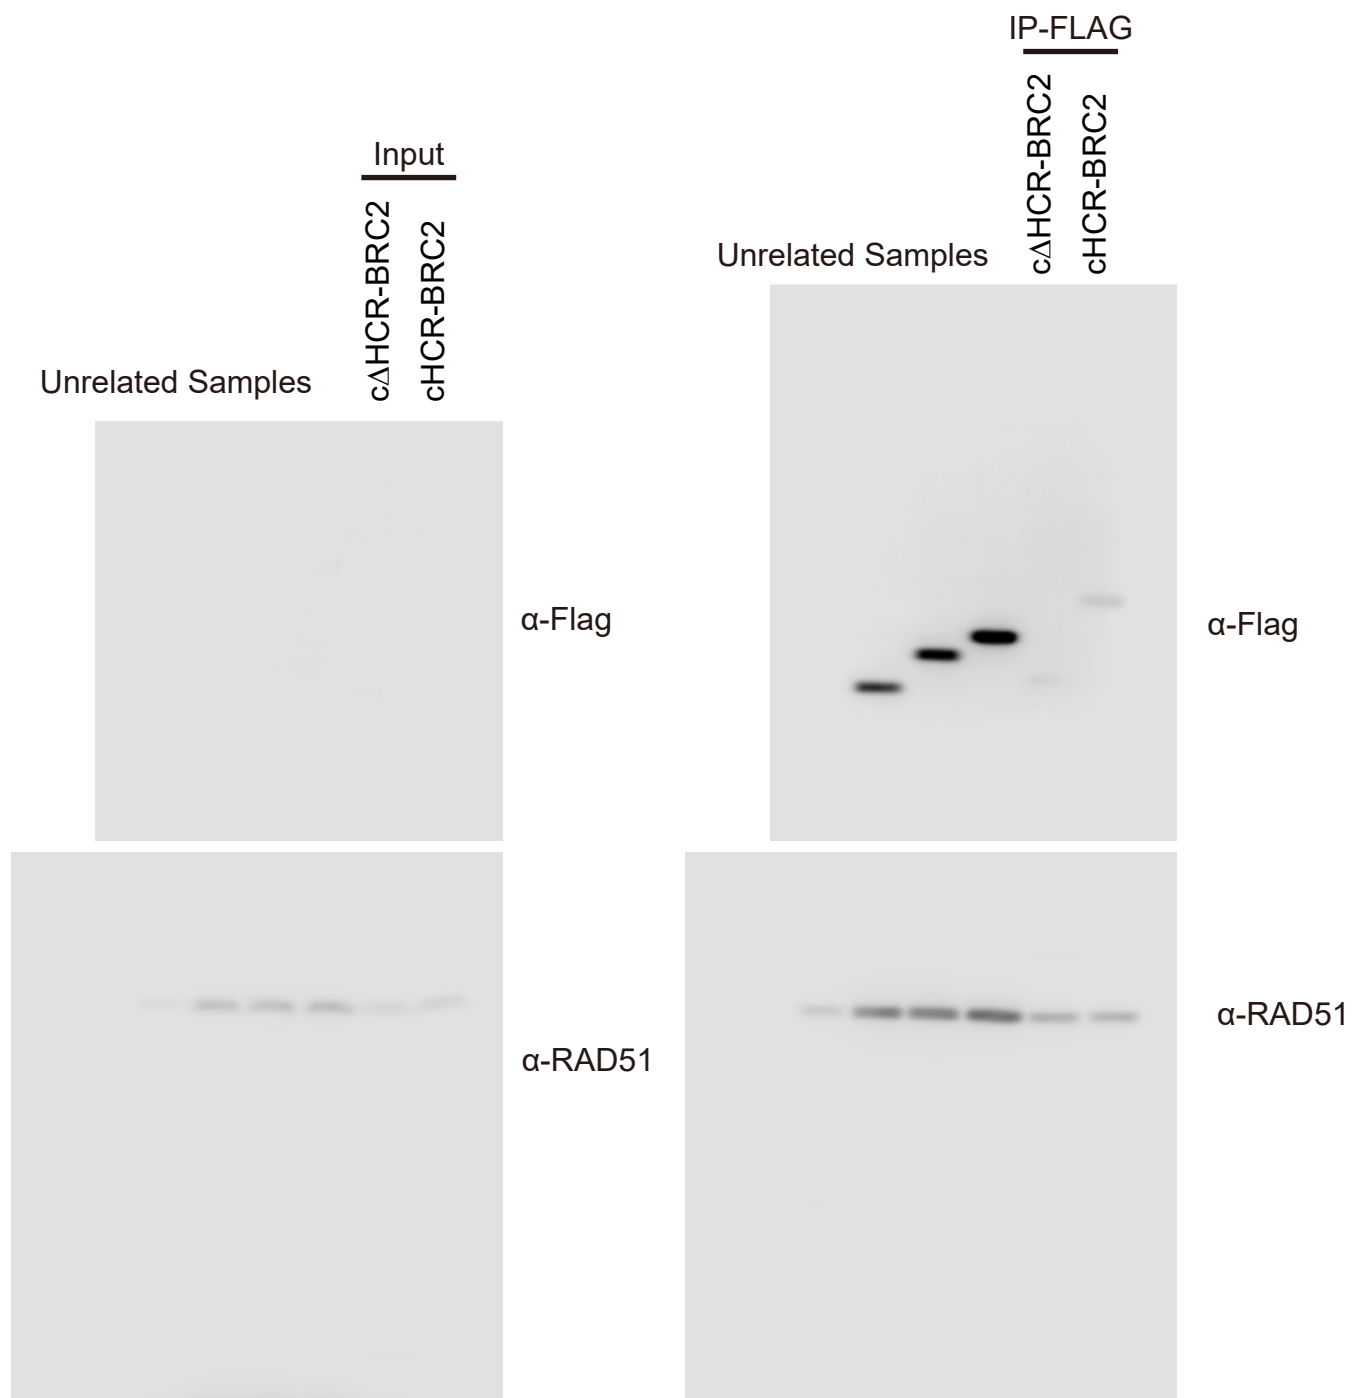

Asterisks (\*) indicate nonspecific bands.

(K)

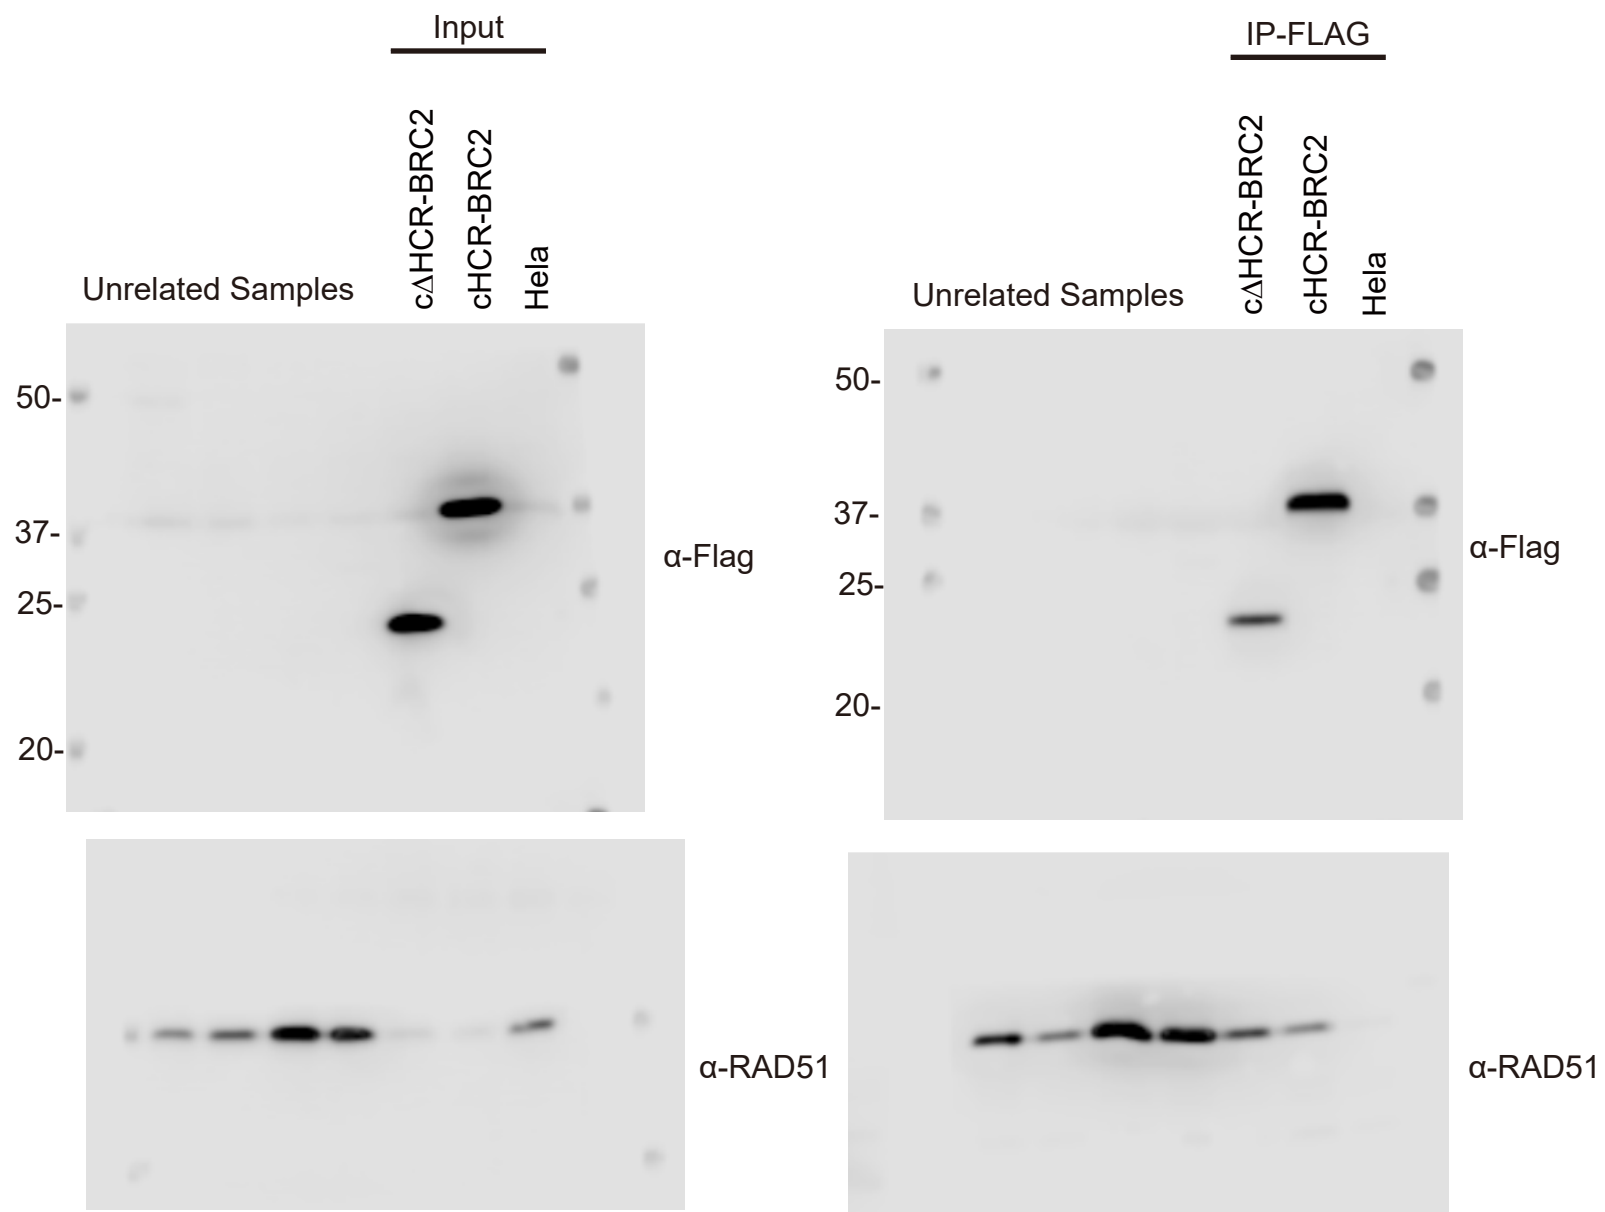

(L)

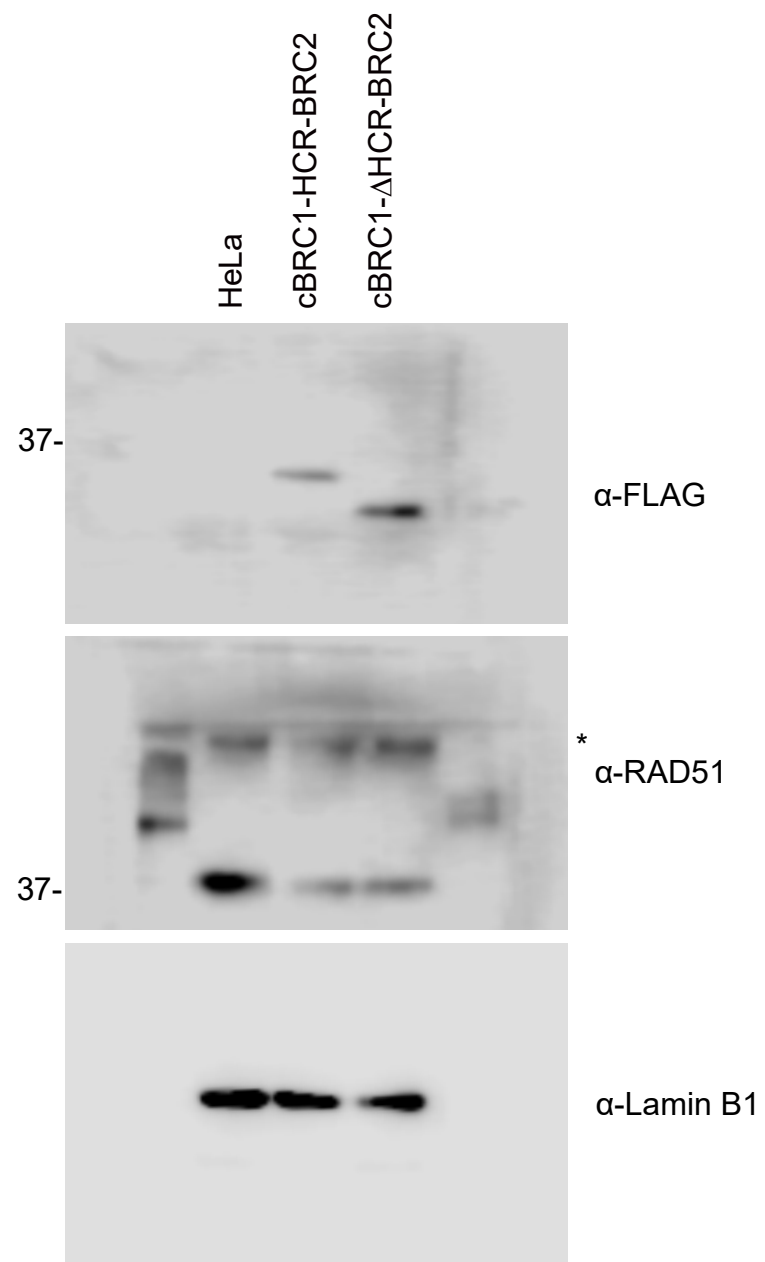

Asterisks (\*) indicate indicate unrelated bands or nonspecific bands



(M)

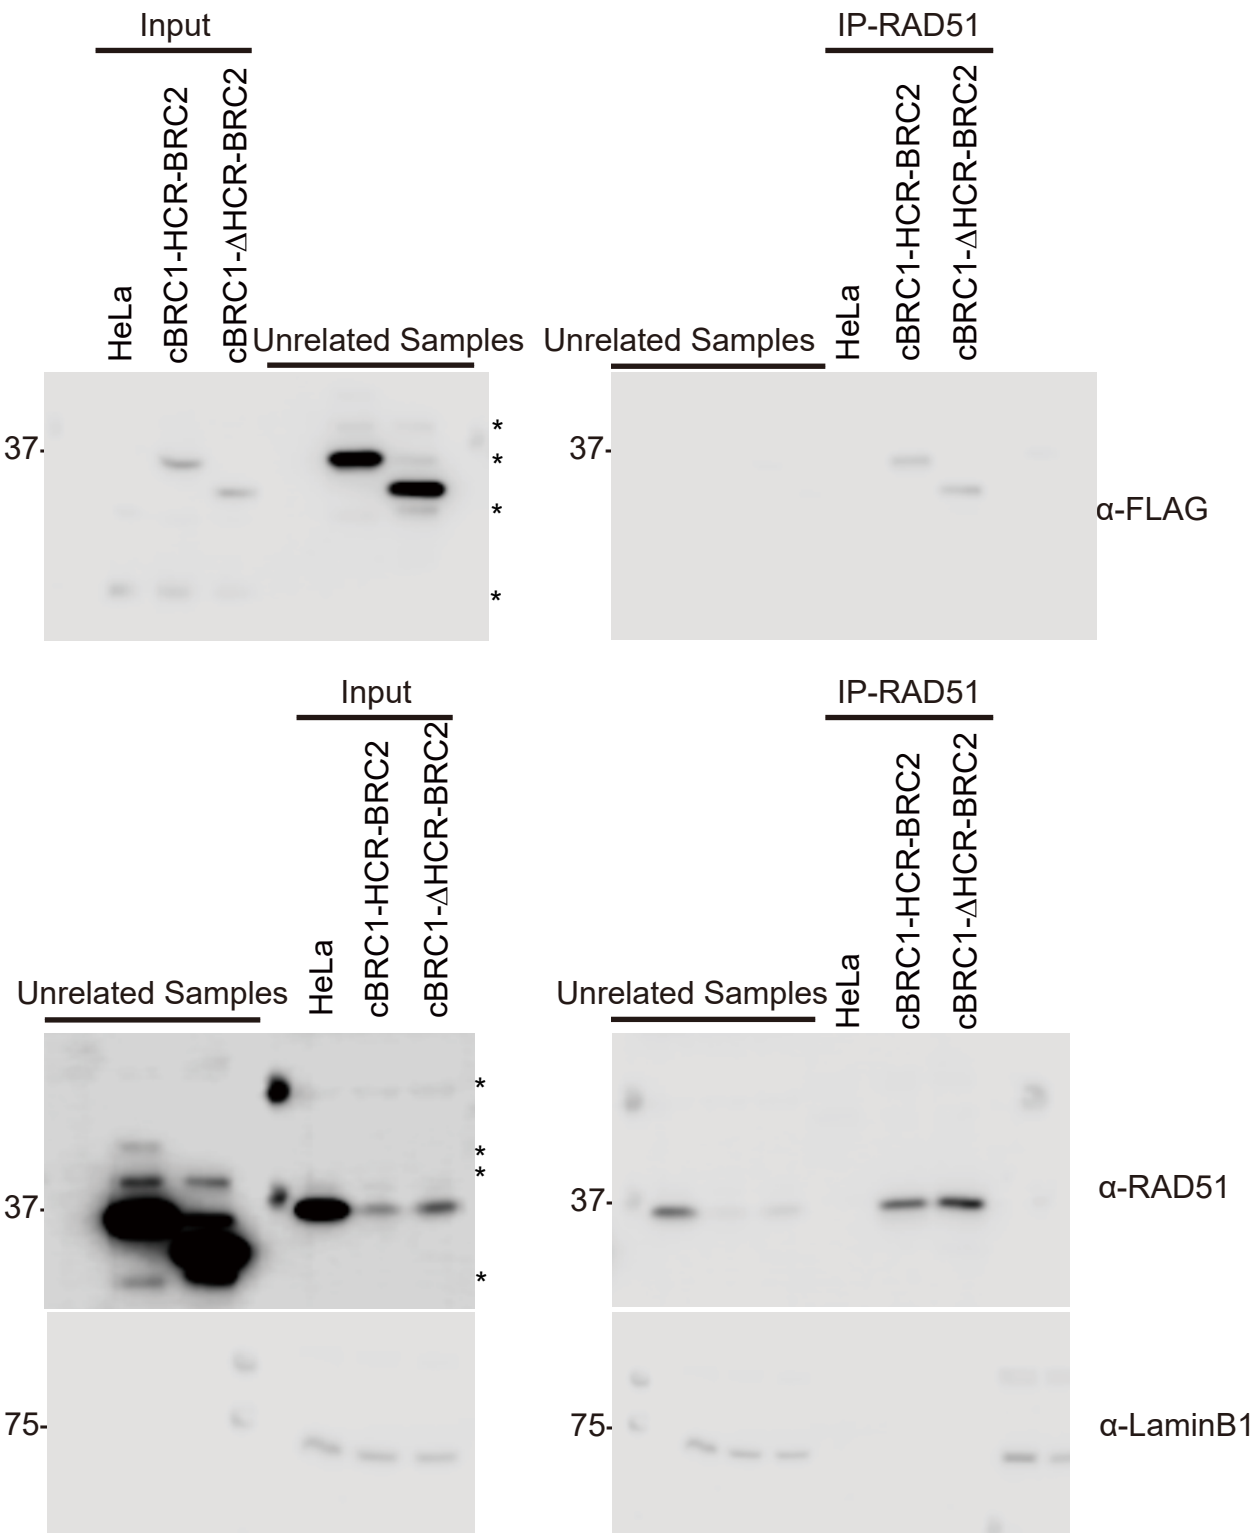

Asterisks (\*) indicate indicate unrelated bands or nonspecific bands

(N)

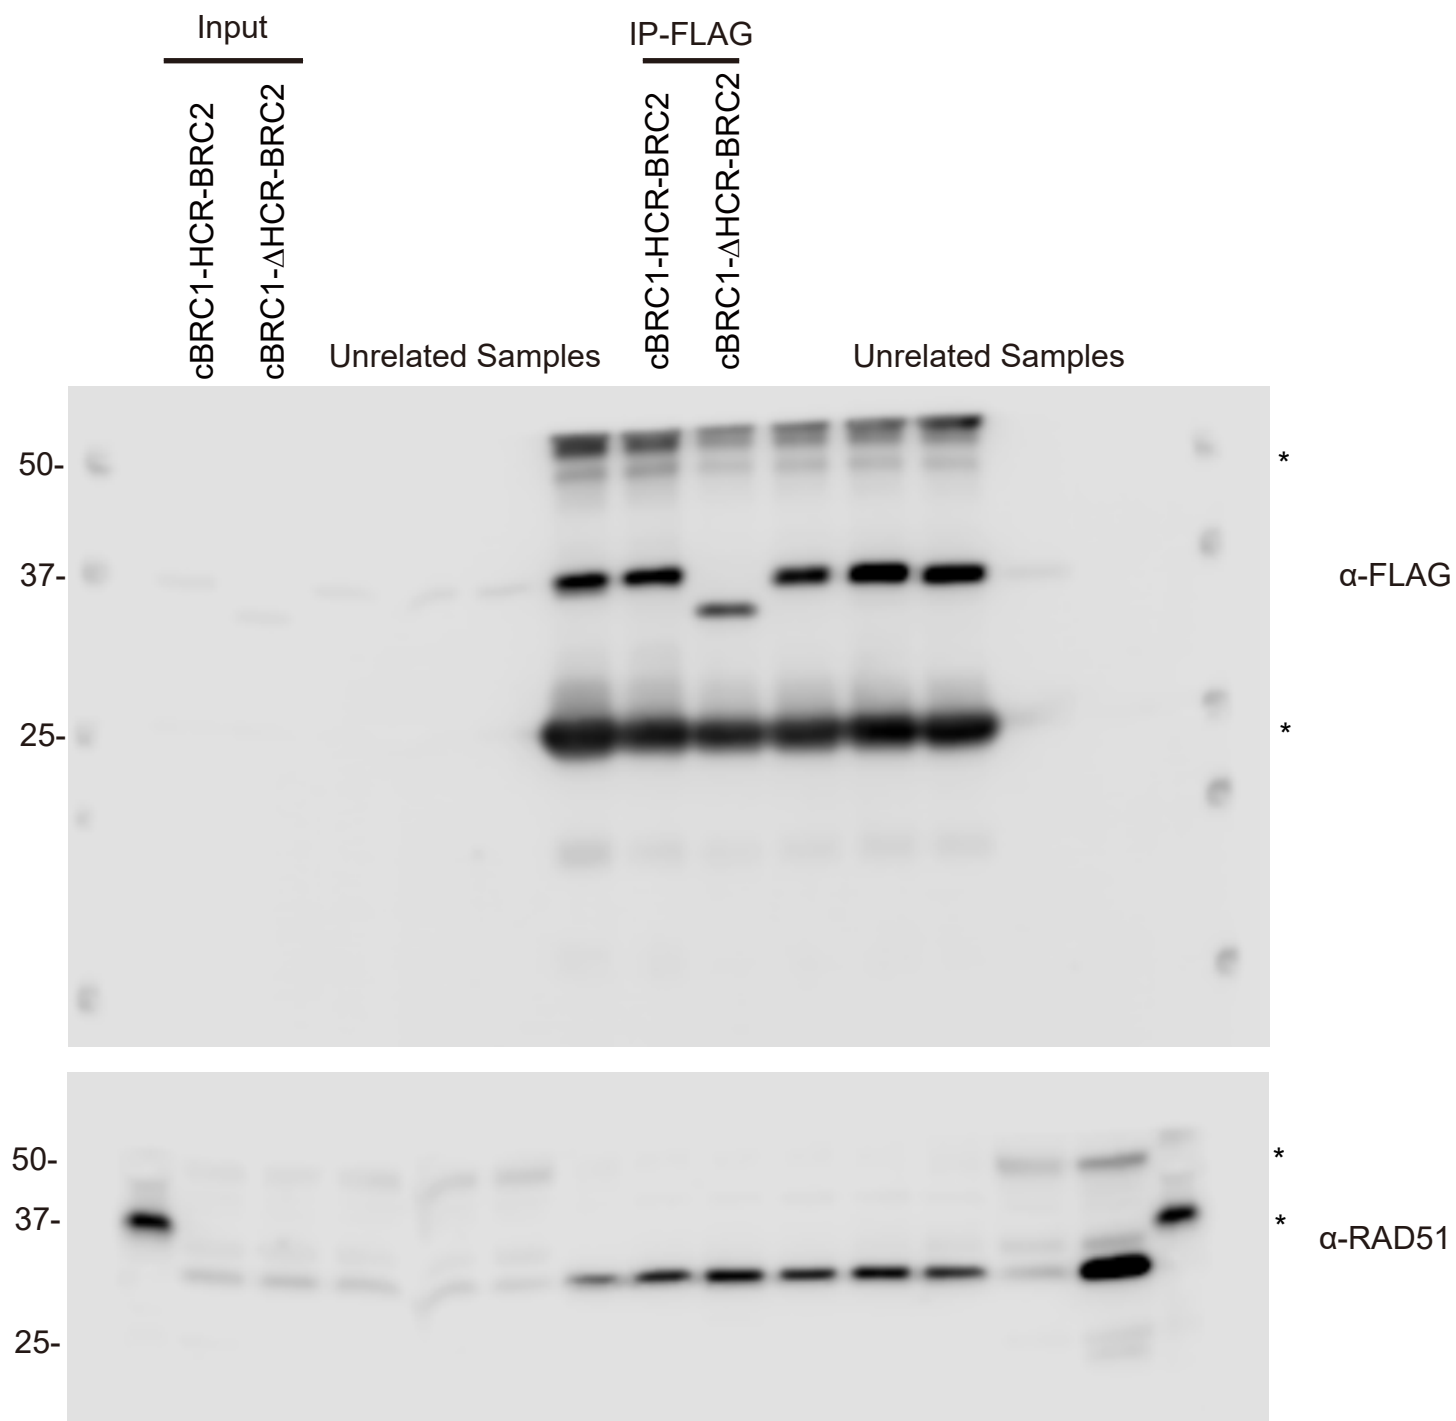

Asterisks (\*) indicate indicate IgG heavy chain and light chain bands or nonspecific bands

(O)

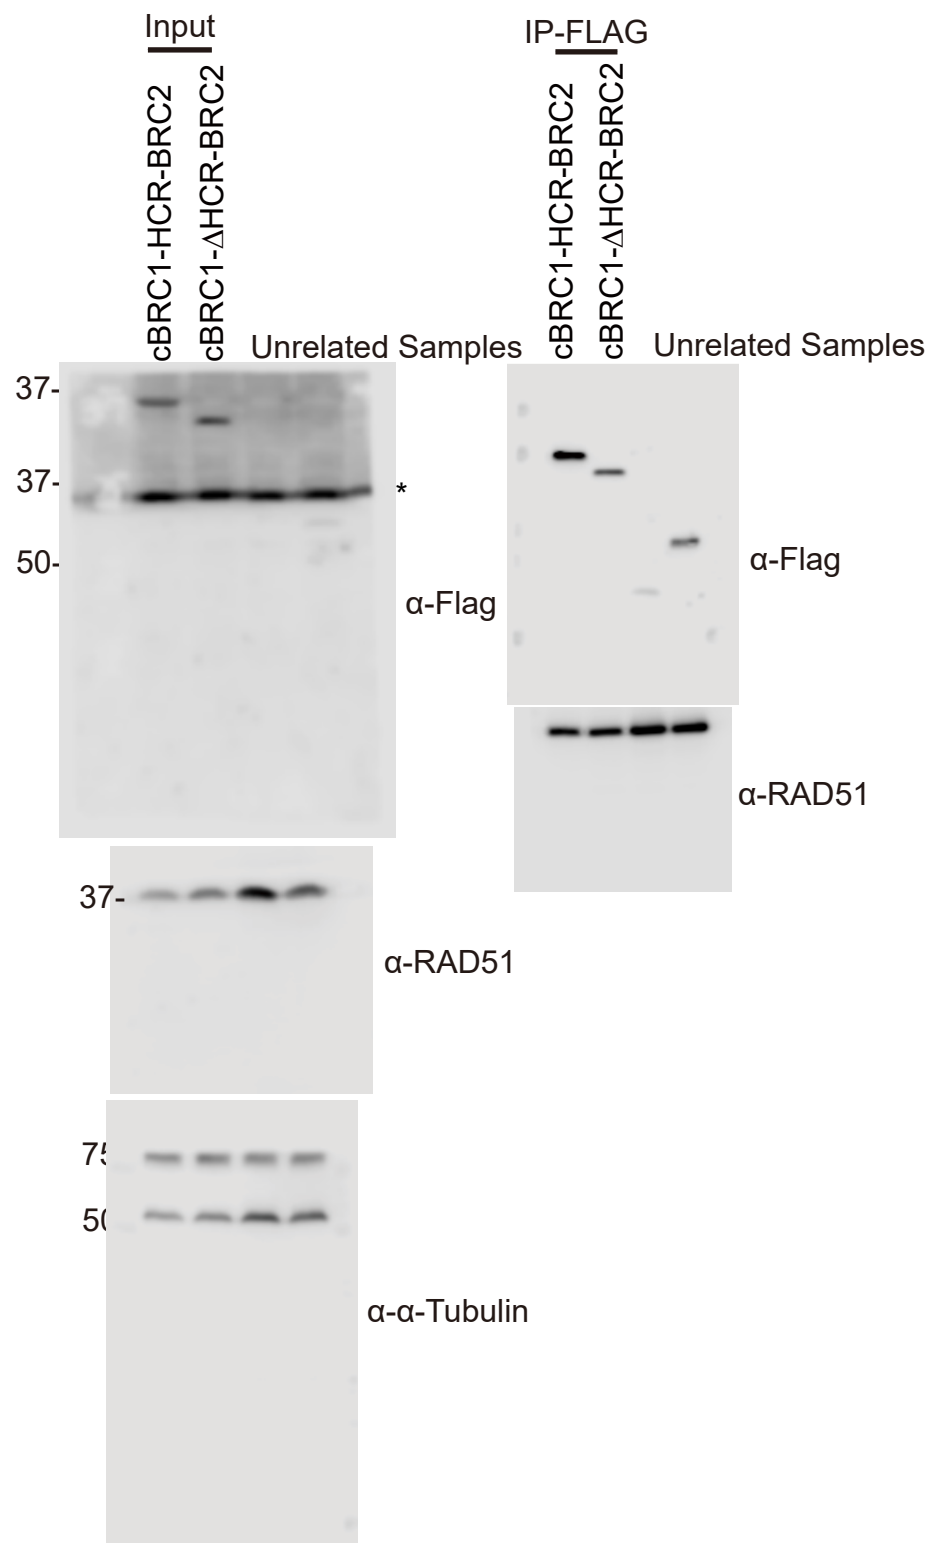

Asterisks (\*) indicate nonspecific bands.

(P)

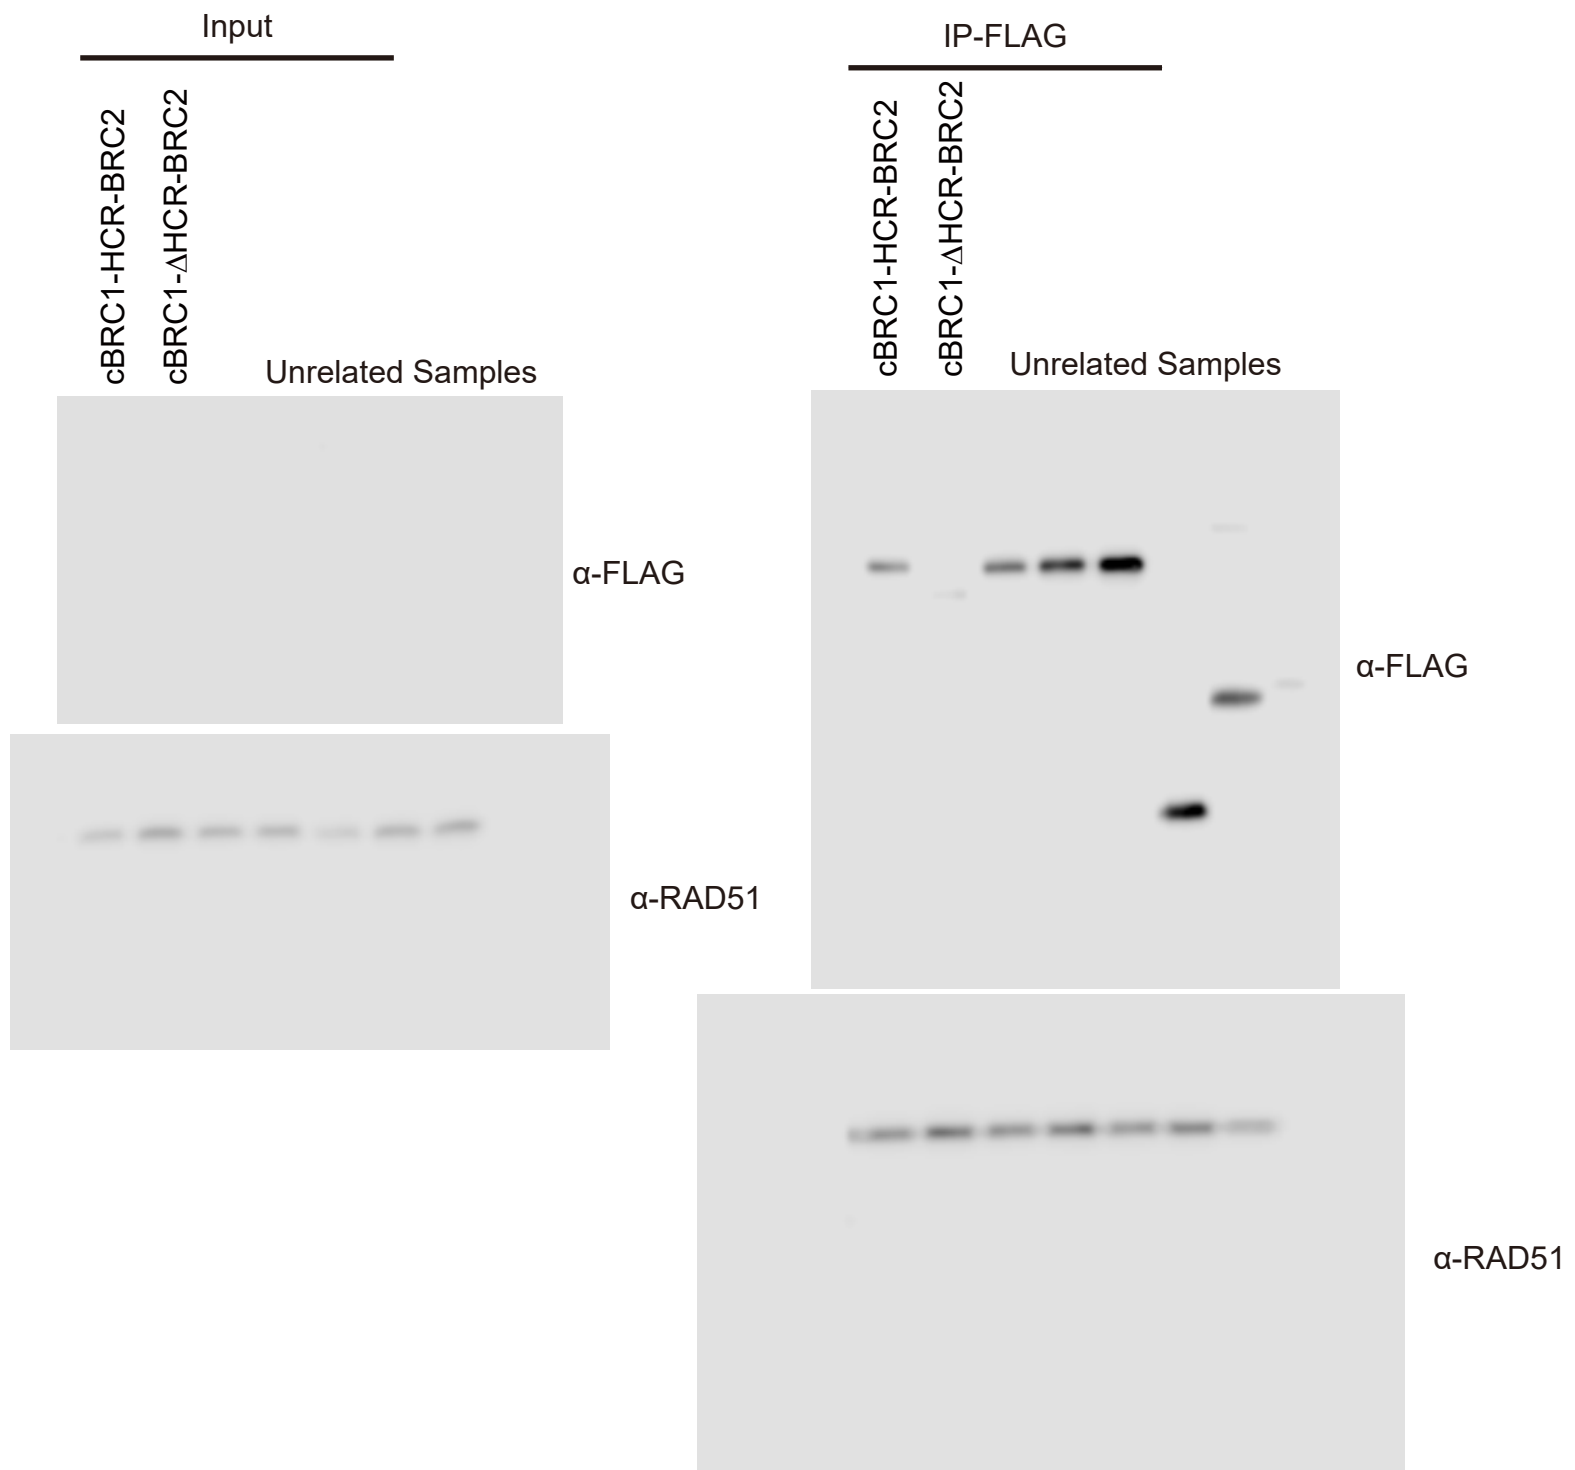

(Q)

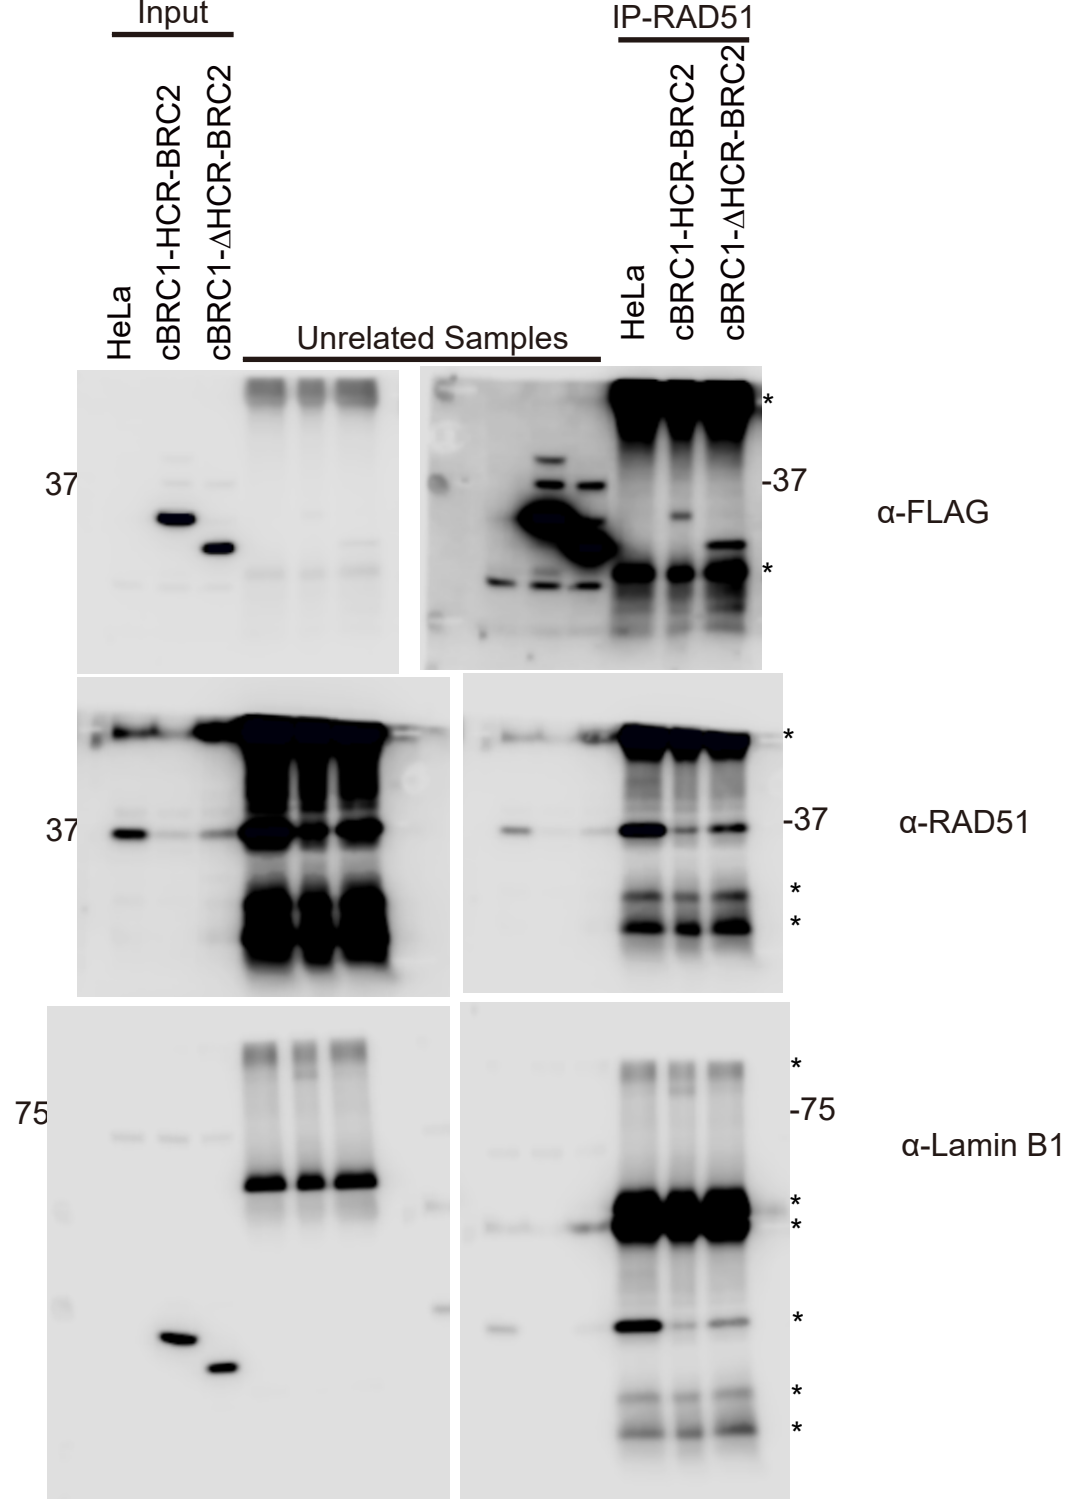

Asterisks (\*) indicate indicate IgG heavy chain and light chain bands, unrelated bands, or nonspecific bands

(R)

10 Gy                      
          Hela    HCR  
          - 1h 2h 4h - 1h 2h 4h

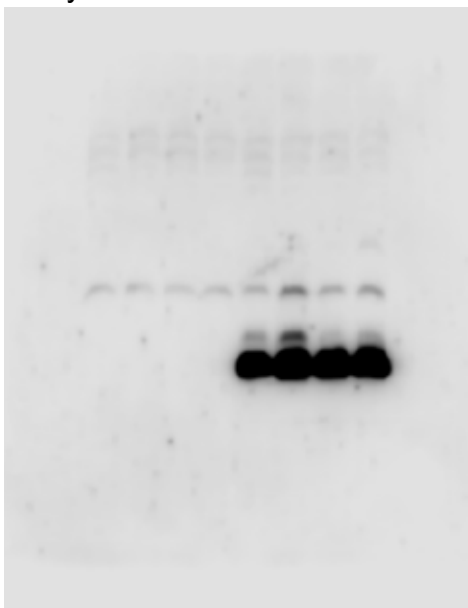

$\alpha$ -FLAG

10 Gy                                
          Hela    HCR    Unrelated Samples  
          - 1h 2h 4h - 1h 2h 4h

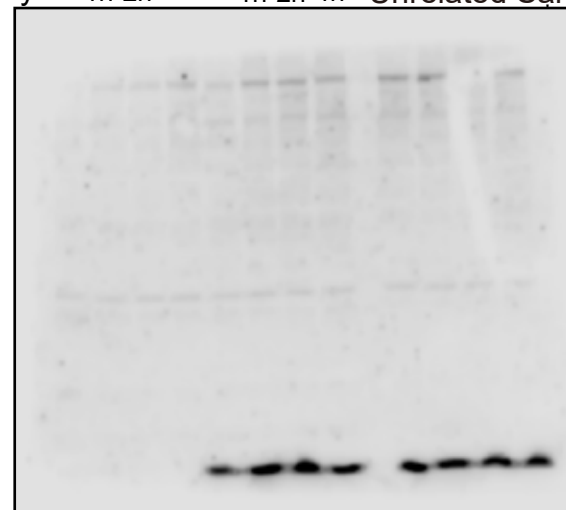

$\alpha$ -FLAG

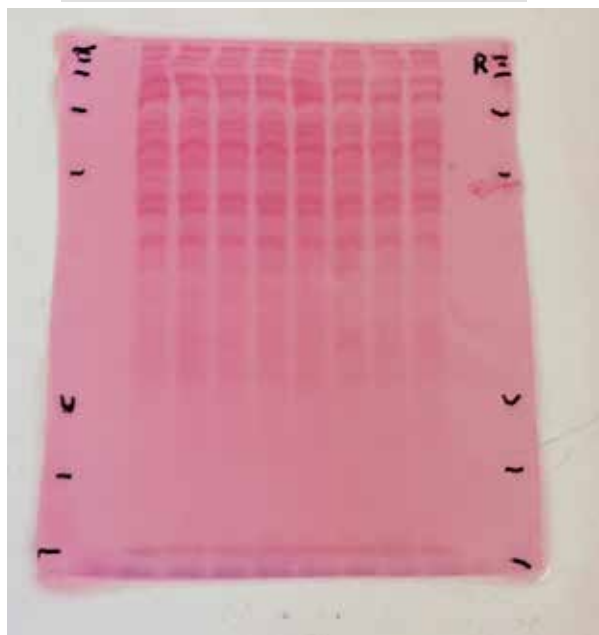

Ponceau

Asterisks (\*) indicate nonspecific bands.

(S)

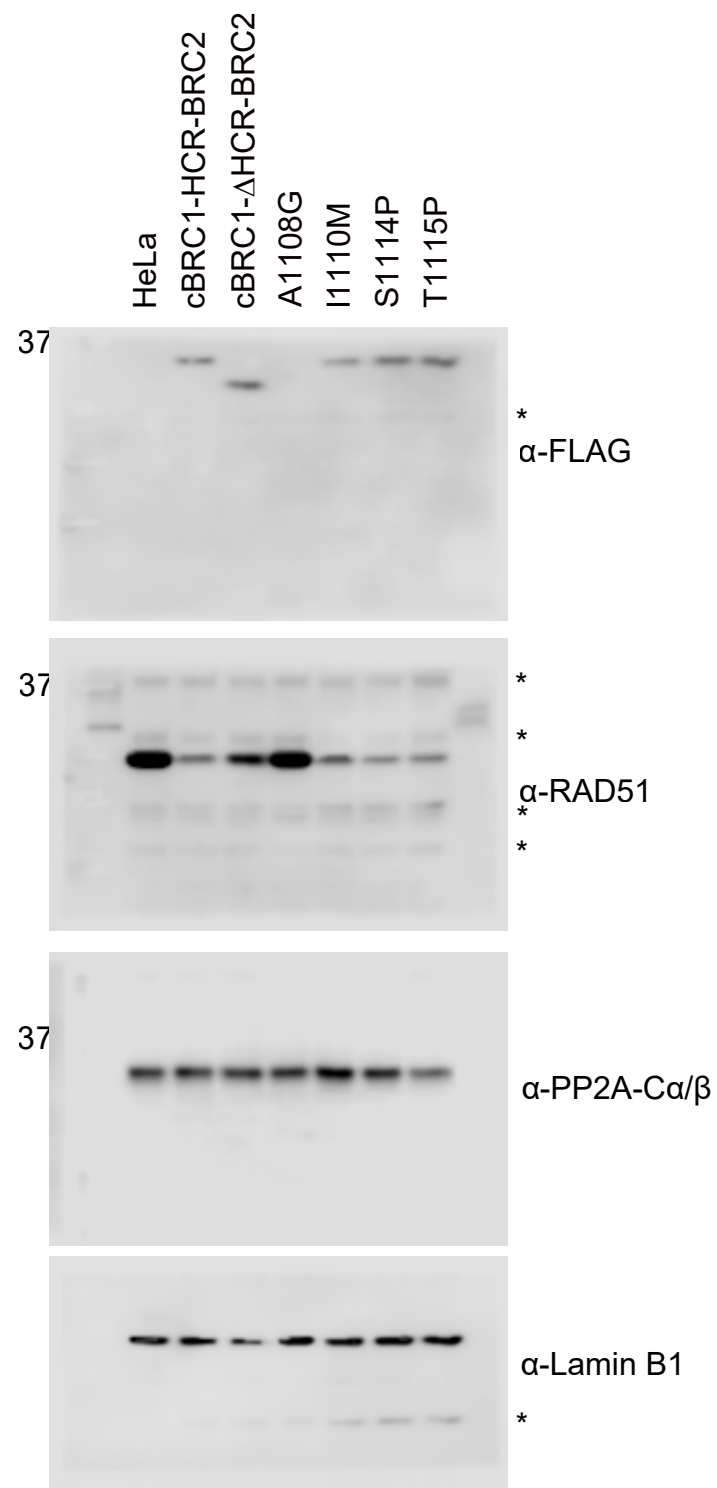

Asterisks (\*) indicate indicate nonspecific bands

(T)

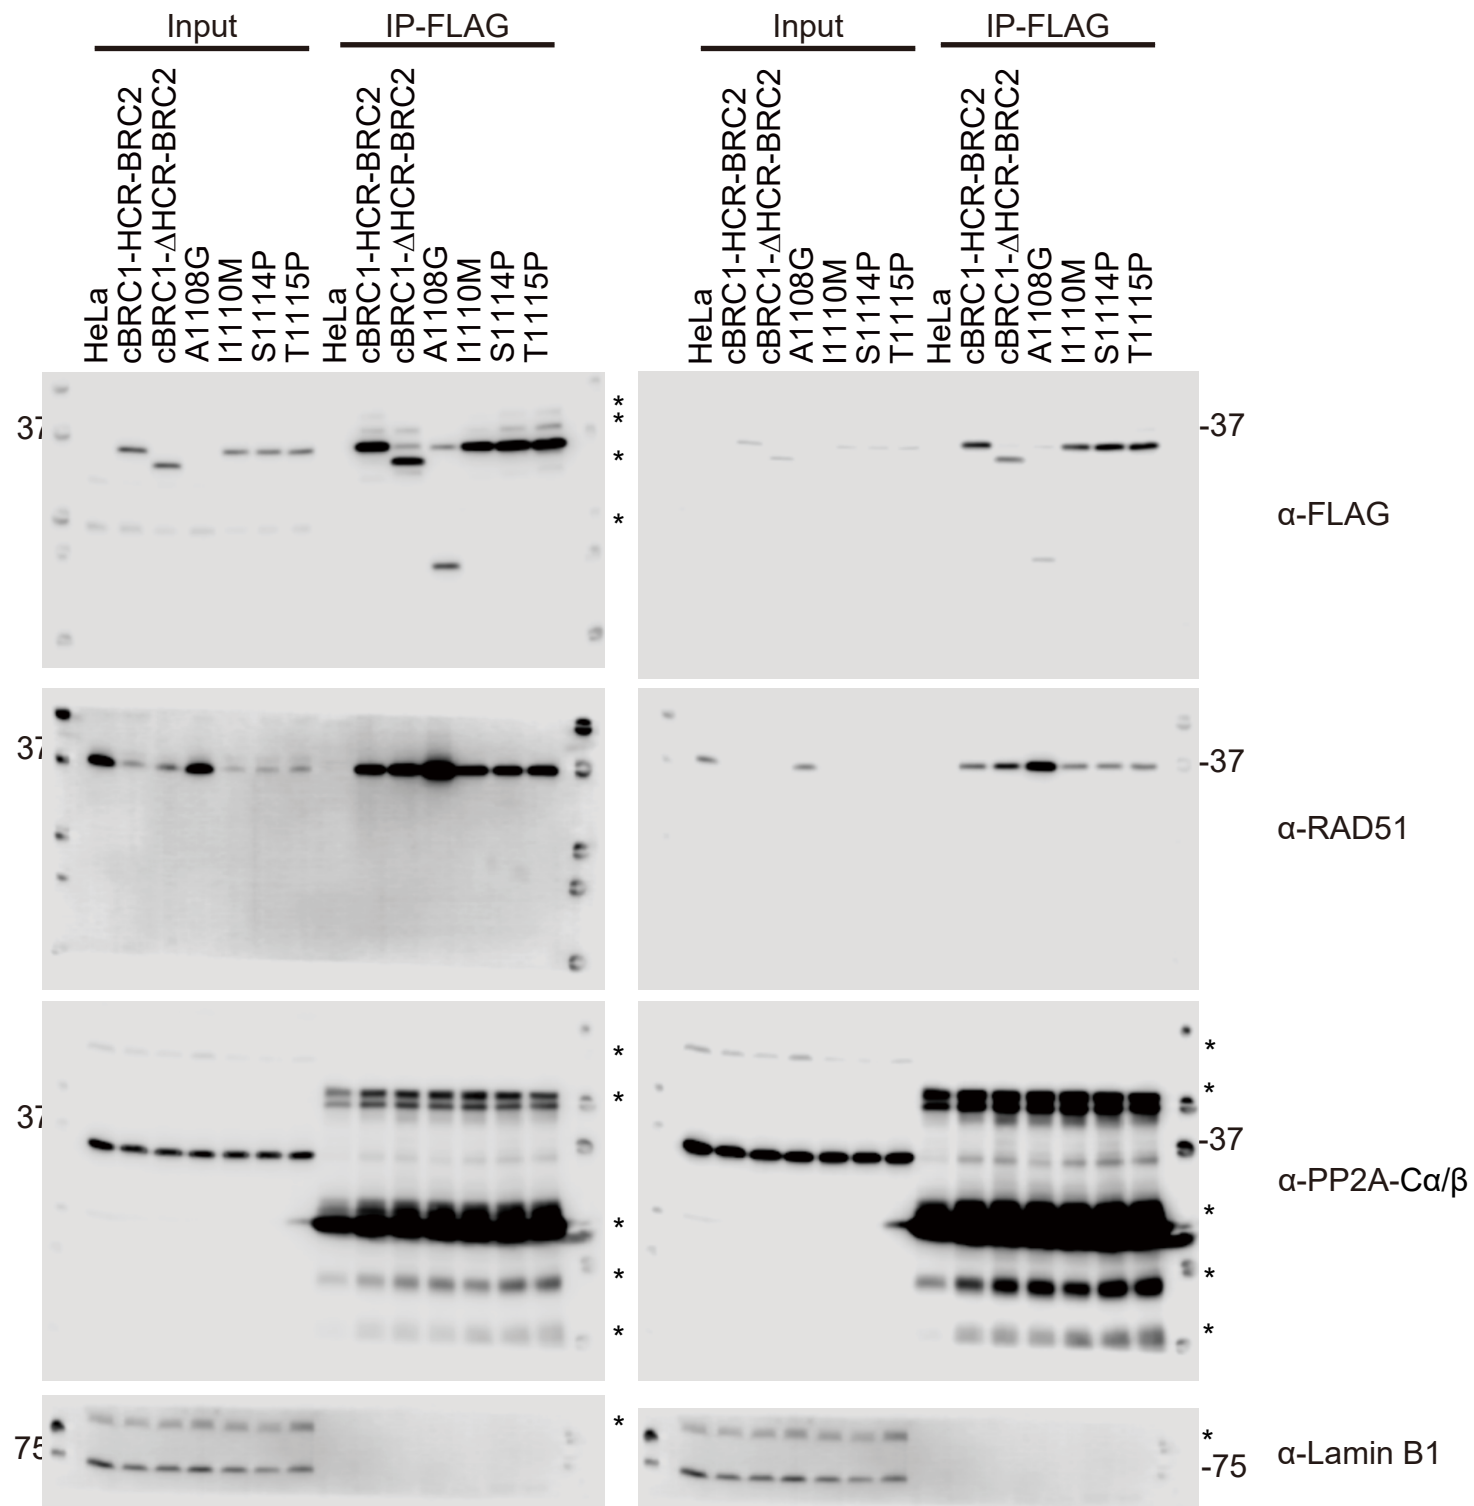

Asterisks (\*) indicate indicate IgG heavy chain and light chain bands, unrelated bands, or nonspecific bands



**Figure S1.** Original Western blot images.

- (A) Original Western blot images of Figure 2A.
- (B) Original Western blot images of Figure 2B and quantitative analysis of Figure 2C.
- (C-F) Original Western blot images of quantitative analysis of Figure 2C.
- (G) Original Western blot images of Figure 2D.
- (H) Original Western blot images of Figure 2E and quantitative analysis of Figure 2F.
- (I-K) Original Western blot images of quantitative analysis of Figure 2F.
- (L) Original Western blot images of Figure 3A.
- (M) Original Western blot images of Figure 3B and quantitative analysis of Figure 3C.
- (N-P) Original Western blot images of quantitative analysis of Figure 3C.
- (Q) Original Western blot images of Figure 3D.
- (R) Original Western blot images of Figure 4B.
- (S) Original Western blot images of Figure 5B.
- (T) Original Western blot images of Figure 5C.
