# Supplementary material for: A Highly Conserved Region in BRCA2 Suppresses the RAD51-Interaction Activity of BRC Repeats
Source: MDPI journal article supplement (doi:10.3390/vetsci10020145), 2023-02-10
Supplement: s1 [file s1]

Supplemental Table S3. The characteristics and *BRCA2* allele type in tumor-free dog samples.

| Breed                         | Age     | Sex | Castration/<br>Contraception | 2135G>A<br>(E643K) | 2213A>G<br>(N669D) | 2329T>C | 2609A>C<br>(K801Q) | 2696A>G<br>(I830V) | 3538T>G<br>(I1110M) | 4481A>C<br>(T1425P) | 4512A>G<br>(K1435R) | 5788G>A | 6886A>G<br>(I2226M) |
|-------------------------------|---------|-----|------------------------------|--------------------|--------------------|---------|--------------------|--------------------|---------------------|---------------------|---------------------|---------|---------------------|
| Beagle                        | 2 y     | ♂   |                              | -                  | -                  | -       | A/C                | -                  | -                   | A/C                 | -                   | -       | -                   |
| Beagle                        | Unknown | ♂   |                              | -                  | -                  | -       | -                  | -                  | -                   | -                   | G/G                 | -       | -                   |
| Beagle                        | 1 y     | ♀   |                              | -                  | -                  | -       | C/C                | -                  | -                   | -                   | -                   | -       | -                   |
| Beagle                        | 1 y     | ♀   |                              | -                  | -                  | -       | -                  | -                  | -                   | A/C                 | -                   | -       | -                   |
| Beagle                        | 1 y     | ♀   |                              |                    |                    |         | -                  | -                  | -                   | A/C                 | -                   | -       | -                   |
| Beagle                        | 1 y     | ♀   |                              | -                  | -                  | -       | -                  | -                  | -                   | -                   | -                   | -       | -                   |
| Beagle                        | 1 y     | ♀   |                              | -                  | -                  | -       | -                  | -                  | -                   | A/C                 | -                   | -       | -                   |
| Beagle                        | 7 y     | ♂   | ✓                            | -                  | -                  | -       | C/C                | -                  | -                   | -                   | -                   | -       | -                   |
| Beagle                        | 4 y     | ♀   |                              | -                  | -                  | -       | C/C                | -                  | -                   | -                   | A/G                 | -       | -                   |
| Beagle                        | 9 y     | ♀   |                              | -                  | -                  | -       | -                  | -                  | -                   | A/C                 | -                   | -       | -                   |
| Beagle                        | 9 y     | ♀   |                              | -                  | -                  | -       | -                  | -                  | -                   | C/C                 | -                   | -       | -                   |
| Bichon Frise                  | 10 y    | ♂   |                              | -                  | -                  | -       | -                  | -                  | -                   | -                   | A/G                 | -       | -                   |
| Cavalier King Charles Spaniel | 4 y     | ♀   |                              | -                  | -                  | -       | C/C                | -                  | -                   | -                   | -                   | -       | -                   |
| Cavalier King Charles Spaniel | 6 y     | ♂   |                              | -                  | -                  | -       | C/C                | -                  | -                   | -                   | -                   | -       | -                   |
| Corgi                         | 11 y    | ♀   |                              | -                  | -                  | -       | C/C                | -                  | -                   | -                   | -                   | -       | -                   |
| Golden retriever              | 5 y     | ♀   |                              | -                  | -                  | -       | C/C                | -                  | -                   | -                   | -                   | -       | -                   |
| Golden retriever              | 7 y     | ♀   |                              | -                  | -                  | -       | A/C                | -                  | -                   | -                   | -                   | -       | -                   |
| Golden retriever              | 11 y    | ♀   |                              | -                  | -                  | -       | C/C                | -                  | -                   | -                   | -                   | -       | -                   |

|                     |      |   |   |   |     |   |     |     |   |   |     |     |     |
|---------------------|------|---|---|---|-----|---|-----|-----|---|---|-----|-----|-----|
| Golden retriever    | 3 y  | ♀ |   | - | -   | - | C/C | -   | - | - | -   | -   | -   |
| Golden retriever    | 8 y  | ♂ |   | - | -   | - | C/C | -   | - | - | -   | -   | -   |
| Golden retriever    | 0 y  | ♂ |   | - | -   | - | A/C | -   | - | - | G/G | -   | -   |
| Golden retriever    | 4 y  | ♀ | ✓ | - | -   | - |     | -   |   | - | -   | -   | -   |
| Irish Water Spaniel | 7 y  | ♂ |   | - | -   | - | A/C | -   | - | - | -   | -   | -   |
| Labrador Retriever  | 5 y  | ♂ |   | - | -   | - | A/C | -   | - | - | -   | -   | -   |
| Labrador Retriever  | 10 y | ♂ |   | - | -   | - | A/C | -   | - | - | -   | -   | -   |
| Labrador Retriever  | 12 y | ♀ |   | - | -   | - | -   | -   | - | - | G/G | -   | -   |
| Maltese             | 10 y | ♂ |   | - | -   | - | -   | -   | - | - | A/G | -   | -   |
| Miniature Dachshund | 5 y  | ♂ | ✓ | - | -   | - | A/C | -   | - | - | -   | -   | -   |
| Miniature Dachshund | 10 y | ♂ |   | - | -   | - | C/C | -   | - | - | -   | -   | -   |
| Miniature Dachshund | 0 y  | ♂ |   | - | -   | - | A/C | -   | - | - | -   | -   | -   |
| Miniature Dachshund | 5 y  | ♂ |   | - | -   | - | A/C | -   | - | - | -   | G/A | -   |
| Miniature Dachshund | 10 y | ♂ |   | - | -   | - | A/C | -   | - | - | -   | -   | -   |
| Miniature Dachshund | 8 y  | ♂ |   | - | -   | - | C/C | -   | - | - | -   | -   | -   |
| Miniature Dachshund | 8 y  | ♂ |   | - | -   | - | -   | -   | - | - | -   | -   | -   |
| Miniature Dachshund | 9 y  | ♀ | ✓ | - | -   | - | A/C | -   | - | - | -   | -   | -   |
| Miniature Dachshund | 7 y  | ♂ |   |   |     |   | -   | -   | - | - | -   | -   | -   |
| Miniature Pinscher  | 12 y | ♀ | ✓ | - | -   | - | -   | -   | - | - | -   | -   | -   |
| Miniature Schnauzer | 14 y | ♂ |   | - | A/G | - | -   | A/G | - | - | -   | -   | A/G |
| Miniature Schnauzer | 9 y  | ♀ |   | - | G/G | - | -   | G/G | - | - | -   | -   | G/G |

[illegible]
