# Supplementary material for: A Highly Conserved Region in BRCA2 Suppresses the RAD51-Interaction Activity of BRC Repeats
Source: MDPI journal article supplement (doi:10.3390/vetsci10020145), 2023-02-10
Supplement: s1 [file s1]

Supplemental Table S1. Base sequences of primers used in this study.

| For PCR |         |                            |                                    | For sequencing                  |
|---------|---------|----------------------------|------------------------------------|---------------------------------|
| 1       | Forward | cB2 intron 10 1036–1058 nt | 5'-CATGTAATTCTTGCTTCAGATAC-3'      | cB2 Exon 11 642–618 nt          |
|         | Reverse | cB2 exon 11 1152–1129 nt   | 5'-CTTTATTAGAAGCTGTTTTGAAGC-3'     | 5'-ACCTTTACTGAAGATGATGCTACTG-3' |
| 2       | Forward | cB2 exon 11 883–903 nt     | 5'-GTACAGACCTGGATGACAAAC-3'        |                                 |
|         | Reverse | cB2 exon 11 2121–2094 nt   | 5'-CAGATTCTGAGTTACAAGTATTTCTACC-3' |                                 |
| 3       | Forward | cB2 exon 11 1799–1820 nt   | 5'-GAATGTTGGTAGTGAAGCATTG-3'       |                                 |
|         | Reverse | cB2 exon 11 3053–3031 nt   | 5'-ATGTACATCAACTTTCTGAGAGG-3'      |                                 |
| 4       | Forward | cB2 exon 11 2860–2881 nt   | 5'-GTGAATTAGCTTGTGGGACAAC-3'       |                                 |
|         | Reverse | cB2 exon 11 4060–4036 nt   | 5'-GTTTTTGAATTAATCTGACAAGGTG-3'    |                                 |
| 5       | Forward | cB2 exon 11 3777–3797 nt   | 5'-CAGACAAAAGTGACAGAGGG-3'         |                                 |
|         | Reverse | cB2 intron 11 143–119 nt   | 5'-GAAATCACATTCCCCTAAACTATAC-3'    |                                 |
