# Supplementary material for: A Highly Conserved Region in BRCA2 Suppresses the RAD51-Interaction Activity of BRC Repeats
Source: MDPI journal article supplement (doi:10.3390/vetsci10020145), 2023-02-10
Supplement: s1 [file s1]

Supplemental Table S2. Characteristics and *BRCA2* allele types of mammary tumor samples.

| Breeds                  | Age      | Benign/Malignant | Pathological diagnosis     | Sex | Contraception | 2135G>A | 2213A>G | 2329T>C | 2609A>C | 2696A>G | 3538T>G  | 4481A>C  | 4512A>G  | 5788G>A | 6886A>G  |
|-------------------------|----------|------------------|----------------------------|-----|---------------|---------|---------|---------|---------|---------|----------|----------|----------|---------|----------|
|                         |          |                  |                            |     |               | (E643K) | (N669D) |         | (K801Q) | (I830V) | (I1110M) | (T1425P) | (K1435R) |         | (I2226M) |
| Chihuahua               | 10 y 9 m | Benign           | Duct papilloma             | ♀   |               | -       | -       | -       | A/C     | -       | -        | -        | G/G      | -       | -        |
| Miniature Dachshund     | 6 y      | Benign           | Adenoma                    | ♀   |               | -       | -       | -       | -       | -       | -        | -        | -        | -       | -        |
| Miniature Dachshund     | 8 y      | Benign           | Benign mixed tumor         | ♀   |               | -       | -       | -       | A/C     | -       | -        | A/C      | -        | -       | -        |
| Miniature Dachshund     | 8 y      | Benign           | Benign mixed tumor         | ♀   |               | -       | -       | -       | A/C     | -       | -        | -        | A/G      | -       | -        |
| Miniature Dachshund     | 9 y      | Benign           | Adenoma                    | ♀   |               | -       | -       | -       | C/C     | -       | -        | -        | -        | -       | -        |
| Miniature Dachshund     | 10 y     | Benign           | Benign mixed tumor         | ♀   |               | -       | -       | -       | A/C     | -       | -        | -        | A/G      | -       | -        |
| Miniature Dachshund     | 9 y 2 m  | Benign           | Complex adenoma            | ♀   |               | -       | -       | -       | -       | -       | -        | -        | -        | -       | -        |
| Pomeranian              | 5 y      | Benign           | Benign mixed tumor         | ♀   |               | -       | -       | -       | A/C     | -       | -        | -        | A/G      | -       | -        |
| Pug                     | 6 y 11 m | Benign           | Complex adenoma            | ♀   |               | -       | -       | -       | -       | -       | -        | -        | -        | -       | -        |
| Toy poodle              | 13 y     | Benign           | Adenoma                    | ♀   | ✓             | -       | -       | -       | -       | -       | -        | -        | A/G      | -       | -        |
| Unknown                 | Unknown  | Benign           | Benign mixed tumor         | ♀   |               | -       | -       | -       | -       | -       | -        | C/C      | -        | -       | -        |
| Unknown                 | Unknown  | Benign           | Benign mixed tumor         | ♀   |               | -       | -       | -       | C/C     | -       | -        | -        | -        | -       | -        |
| American Cocker Spaniel | 7 y 2 m  | Malignant        | Complex carcinoma          | ♀   |               | -       | -       | -       | C/C     | -       | -        | -        | -        | -       | -        |
| Corgi                   | 10 y 4 m | Malignant        | Squamous cell carcinoma    | ♀   |               | -       | -       | -       | C/C     | -       | -        | -        | -        | -       | -        |
| Doberman                | 1 y 10 m | Malignant        | Complex and simple adenoma | ♀   |               | -       | -       | -       | C/C     | -       | -        | -        | -        | -       | -        |
| Golden retriever        | 8 y 3 m  | Malignant        | Complex carcinoma          | ♀   | Unknown       | -       | -       | -       | A/C     | -       | -        | -        | A/G      | -       | -        |
| Labrador Retriever      | 11 y 1 m | Malignant        | Benign mixed tumor         | ♀   |               | -       | -       | -       | A/C     | -       | -        | -        | G/G      | -       | -        |
| Labrador Retriever      | 12 y 9 m | Malignant        | Simple carcinoma           | ♀   |               | -       | -       | -       | A/C     | -       | -        | -        | -        | -       | -        |

|                               |           |           |                   |   |         |   |     |     |     |     |   |     |     |     |     |
|-------------------------------|-----------|-----------|-------------------|---|---------|---|-----|-----|-----|-----|---|-----|-----|-----|-----|
| Miniature Dachshund           | 10 y      | Malignant | Complex carcinoma | ♀ |         | - | -   | -   | C/C | -   | - | -   | -   | -   | -   |
| Miniature Dachshund           | 8 y       | Malignant | Complex carcinoma | ♀ |         | - | -   | -   | -   | -   | - | -   | G/G | -   | -   |
| Miniature Dachshund           | 9 y 4 m   | Malignant | Simple carcinoma  | ♀ |         | - | -   | -   | A/C | -   | - | -   | -   | -   | -   |
| Miniature Dachshund           | 9 y 1 m   | Malignant | Simple carcinoma  | ♀ |         | - | -   | -   | -   | -   | - | -   | -   | -   | -   |
| Papillon                      | 12 y      | Malignant | Complex carcinoma | ♀ |         | - | -   | -   | A/C | -   | - | A/C | -   | -   | -   |
| Pomeranian                    | 13 y 1 m  | Malignant | Complex carcinoma | ♀ |         | - | -   | -   | -   | -   | - | -   | -   | -   | -   |
| Shiba                         | 11 y      | Malignant | Simple carcinoma  | ♀ |         | - | -   | C/T | A/C | -   | - | -   | -   | G/A | -   |
| Shih Tzu                      | 8 y 10 m  | Malignant | Complex carcinoma | ♀ |         | - | -   | -   | -   | -   | - | C/C | -   | -   | -   |
| Shih Tzu                      | 8 y 8 m   | Malignant | Simple carcinoma  | ♀ |         | - | -   | -   | -   | -   | - | -   | A/G | -   | -   |
| Toy poodle                    | 10 y      | Malignant | Complex carcinoma | ♀ |         | - | A/G | -   | -   | A/G | - | -   | G/G | -   | A/G |
| Mix                           | 13 y      | Malignant | Complex carcinoma | ♀ | ✓       | - | -   | -   | -   | -   | - | -   | A/G | -   | -   |
| Mix                           | 10 y 2 m  | Malignant | Simple carcinoma  | ♀ |         | - | -   | -   | -   | -   | - | -   | -   | -   | -   |
| Mix                           | 10 y 10 m | Malignant | Complex carcinoma | ♀ |         | - | -   | -   | A/C | -   | - | -   | A/G | -   | -   |
| Ainu                          | 10 y      | Unknown   | —                 | ♀ |         | - | -   | -   | -   | -   | - | -   | -   | -   | -   |
| Cavalier King Charles Spaniel | 11 y 5 m  | Unknown   | —                 | ♀ |         | - | -   | -   | -   | -   | - | -   | G/G | -   | -   |
| Cavalier King Charles Spaniel | 14 y      | Unknown   | —                 | ♀ |         | - | -   | -   | A/C | -   | - | -   | G/G | -   | -   |
| Chihuahua                     | 13 y      | Unknown   | —                 | ♀ |         | - | -   | -   | -   | -   | - | -   | -   | -   | -   |
| English Setter                | 16 y      | Unknown   | —                 | ♀ | Unknown | - | -   | -   | -   | -   | - | -   | -   | -   | -   |
| Golden retriever              | 6 y       | Unknown   | —                 | ♀ | Unknown | - | -   | -   | -   | -   | - | -   | G/G | -   | -   |
| Golden retriever              | 7 y 10 m  | Unknown   | —                 | ♀ |         | - | -   | -   | -   | -   | - | -   | G/G | -   | -   |
| Miniature Dachshund           | 8 y 5 m   | Unknown   | —                 | ♀ |         | - | -   | -   | A/C | -   | - | -   | -   | -   | -   |

|                     |          |         |   |   |         |     |     |     |     |     |     |     |     |   |     |
|---------------------|----------|---------|---|---|---------|-----|-----|-----|-----|-----|-----|-----|-----|---|-----|
| Miniature Dachshund | 9 y      | Unknown | — | ♀ | Unknown | -   | -   | -   | A/C | -   | -   | -   | -   | - | -   |
| Miniature Dachshund | 11 y     | Unknown | — | ♀ |         | -   | -   | -   | A/C | -   | -   | -   | -   | - | -   |
| Papillon            | 6 y      | Unknown | — | ♀ |         | -   | -   | -   | A/C | -   | -   | -   | -   | - | -   |
| Papillon            | 13 y     | Unknown | — | ♀ |         | -   | -   | -   | C/C | -   | -   | -   | -   | - | -   |
| Pomeranian          | Unknown  | Unknown | — | ♀ | Unknown | -   | -   | -   | -   | -   | -   | C/C | A/G | - | -   |
| Poodle              | 12 y     | Unknown | — | ♀ |         | -   | A/G | -   | -   | A/G | -   | -   | G/G | - | A/G |
| Poodle              | 14 y     | Unknown | — | ♀ |         | -   | -   | -   | C/C | -   | -   | -   | -   | - | A/G |
| Pug                 | 8 y      | Unknown | — | ♀ | Unknown | -   | -   | -   | C/C | -   | -   | -   | -   | - | -   |
| Pug                 | 8 y      | Unknown | — | ♀ | Unknown | -   | -   | -   | C/C | -   | -   | -   | -   | - | -   |
| Shetland Sheepdog   | 7 y 6 m  | Unknown | — | ♀ | ✓       | -   | -   | -   | A/C | -   | -   | -   | -   | - | -   |
| Shetland Sheepdog   | 8 y 6 m  | Unknown | — | ♀ |         | -   | -   | -   | A/C | -   | G/G | -   | -   | - | -   |
| Shetland Sheepdog   | 11 y     | Unknown | — | ♀ |         | -   | -   | -   | C/C | -   | -   | -   | -   | - | -   |
| Shetland Sheepdog   | 13 y     | Unknown | — | ♀ |         | -   | -   | -   | -   | -   | -   | -   | -   | - | -   |
| Shiba               | 13 y 7 m | Unknown | — | ♀ | Unknown | -   | -   | -   | A/C | -   | -   | -   | A/G | - | -   |
| Shih Tzu            | 12 y     | Unknown | — | ♀ |         | G/A | -   | C/T | -   | -   | -   | -   | G/G | - | -   |
| Shih Tzu            | 16 y     | Unknown | — | ♀ | Unknown | -   | -   | -   | A/C | -   | -   | -   | G/G | - | -   |
| Shih Tzu            | 7 y 8 m  | Unknown | — | ♀ |         | -   | -   | -   | -   | -   | -   | -   | -   | - | -   |
| Toy poodle          | 14 y     | Unknown | — | ♀ | ✓       | -   | A/G | -   | -   | A/G | -   | -   | G/G | - | A/G |
| Toy poodle          | 13 y     | Unknown | — | ♀ |         | -   | G/G | -   | -   | G/G | -   | -   | -   | - | G/G |
| Mix                 | 11 y     | Unknown | — | ♀ | ✓       | -   | -   | -   | -   | -   | -   | -   | G/G | - | -   |
| Mix                 | 15 y     | Unknown | — | ♀ |         | -   | -   | -   | C/C | -   | -   | -   | -   | - | -   |

|         |          |         |   |   |         |     |   |     |     |   |   |     |     |     |   |
|---------|----------|---------|---|---|---------|-----|---|-----|-----|---|---|-----|-----|-----|---|
| Mix     | 12 y 8 m | Unknown | — | ♀ |         | -   | - | C/C | -   | - | - | -   | G/G | -   | - |
| Mix     | 11 y     | Unknown | — | ♀ | Unknown | -   | - | -   | -   | - | - | -   | G/G | -   | - |
| Mix     | Unknown  | Unknown | — | ♀ | Unknown | -   | - | -   | -   | - | - | C/C | -   | -   | - |
| Mix     | Unknown  | Unknown | — | ♀ | Unknown | -   | - | -   | -   | - | - | C/C | -   | -   | - |
| Mix     | 11 y     | Unknown | — | ♀ | Unknown | -   | - | -   | -   | - | - | -   | A/G | -   | - |
| Mix     | 10 y     | Unknown | — | ♀ | Unknown | -   | - | -   | -   | - | - | -   | A/G | -   | - |
| Mix     | 13 y     | Unknown | — | ♀ | Unknown | -   | - | -   | A/C | - | - | -   | -   | G/A | - |
| Mix     | Unknown  | Unknown | — | ♀ | Unknown | G/A | - | C/T | -   | - | - | -   | G/G | G/A | - |
| Mix     | 13 y     | Unknown | — | ♀ |         | -   | - | -   | -   | - | - | -   | G/G | -   | - |
| Unknown | Unknown  | Unknown | — | ♀ | Unknown | -   | - | -   | A/C | - | - | -   | G/G | -   | - |
| Unknown | Unknown  | Unknown | — | ♀ | Unknown | A/A | - | C/C | -   | - | - | -   | -   | A/A | - |
| Unknown | Unknown  | Unknown | — | ♀ |         | -   | - | -   | C/C | - | - | -   | -   | -   | - |

---
